1 **Estrogen exacerbates mammary involution through neutrophil dependent and**  
2 **independent mechanism**

3 Chew Leng Lim<sup>1,2#</sup>, Yu Zuan Or<sup>2#</sup>, Zoe Ong<sup>2</sup>, Hwa Hwa Chung<sup>2</sup>, Hirohito Hayashi<sup>3</sup>, Smeeta  
4 Shrestha<sup>5</sup>, Shunsuke Chiba<sup>3</sup>, Lin Feng<sup>4</sup>, Valerie CL Lin<sup>2</sup>

5

6 <sup>1</sup>NTU Institute for Health Technologies, Interdisciplinary Graduate School, Nanyang  
7 Technological University, Singapore

8 <sup>2</sup>School of Biological Sciences, Nanyang Technological University, Singapore

9 <sup>3</sup>Division of Chemistry and Biological Chemistry, School of Physical and Mathematical  
10 Sciences, Nanyang Technological University, Singapore

11 <sup>4</sup>School of Computer Science and Engineering, Nanyang Technological University, Singapore

12 <sup>5</sup>School of Basic and Applied Sciences, Dayananda Sagar University, Bangalore, India

13 #: Both authors contributed equally to this work.

14

15 Correspondence author:

16 *Valerie CL Lin* PhD

17 School of Biological Sciences,

18 Nanyang Technological University, Singapore 637551.

19 Tel: 65 63162843; Fax: 65 67913856

20 Email: [cclin@ntu.edu.sg](mailto:cclin@ntu.edu.sg)

## 21 **Abstract**

22 There is strong evidence that the pro-inflammatory microenvironment during post-partum  
23 mammary involution promotes parity-associated breast cancer. Estrogen exposure during  
24 mammary involution drives tumour growth through the activity of neutrophils. However, how  
25 estrogen and neutrophils influence mammary involution are unknown. Combined analysis of  
26 transcriptomic, protein, and immunohistochemical data in Balb/c mice with and without  
27 neutrophil depletion showed that estrogen promotes involution by exacerbating inflammation,  
28 cell death and adipocytes repopulation through neutrophil-dependent and neutrophil-  
29 independent mechanisms. Remarkably, 88% of estrogen-regulated genes in mammary tissue  
30 were mediated through neutrophils, which were recruited through estrogen-induced CXCL2-  
31 CXCR2 signalling. While neutrophils mediate estrogen-induced inflammation and adipocytes  
32 repopulation, estrogen-induced mammary cell death was mediated by neutrophils-independent  
33 upsurges of cathepsins and their lysosomal leakages that are critical for lysosome-mediated  
34 cell death. Notably, these multifaceted effects of estrogen are unique to the phase of mammary  
35 involution. These findings are important for the development of intervention strategies for  
36 parity-associated breast cancer.

## 37 **Introduction**

38           There is strong evidence that the mammary microenvironment during the post-partum  
39 mammary involution promotes mammary tumour progression. High levels of tissue fibrillar  
40 collagen and elevated expression of cyclooxygenase-2 (COX-2) in the mammary gland have  
41 been shown to drive tumour growth and lymph angiogenesis [1, 2]. Wound healing-like tissue  
42 environment associated with mammary involution is also known to promote tumour  
43 development and dissemination [3]. Estrogen has been shown to stimulate the growth of  
44 estrogen receptor-negative mammary tumours during mammary involution and estrogen-  
45 stimulated neutrophil activity plays a crucial role in fostering the pro-tumoral  
46 microenvironment [4]. This suggests that estrogen exposure during post-weaning mammary  
47 involution is a risk factor for parity-associated breast cancer. However, the functional roles of  
48 estrogen and neutrophils in mammary biology during involution have been little studied to date.

49           Post-weaning mammary involution is a process for the lactating mammary gland to  
50 return to the pre-pregnancy state. The distinctive features of mammary involution include  
51 massive cell death of the secretory mammary alveoli, acute inflammation, extracellular matrix  
52 remodelling and adipocyte repopulation. Involution is commonly divided into two phases. In  
53 mice, the first phase is the reversible phase whereby the reintroduction of the pups within 48h  
54 can re-initiate lactation [5, 6]. It is typified by a decrease in milk protein synthesis and increased  
55 mammary cell death resulting in the appearance of shed, dying cells within the lumen of the  
56 distended alveoli [7, 8]. Inflammation also occurs in the first phase with the infiltration of  
57 immune cells and up-regulation of immune response genes [9, 10]. The second, and irreversible  
58 phase of mammary involution occurs after 72h of weaning. This phase is morphologically  
59 characterized by the collapse of the alveolar structure, the second wave of epithelial cell death,  
60 continued inflammation and the repopulation of adipocytes. This is followed by mammary  
61 regeneration and tissue remodelling to the pre-pregnancy state.

62 Neutrophils are the most abundant leukocytes in the innate immune system against  
63 invading pathogens. Neutrophils are also activated in response to sterile inflammation, but the  
64 outcome is complicated and depends on the context [11]. The importance of neutrophils in  
65 tumour development has been increasingly recognized in recent years. Tumour-associated  
66 neutrophils have been classified into the anti-tumour neutrophils (N1) and pro-tumour  
67 neutrophils (N2) based on the expression of specific markers [12]. Neutrophils are known to  
68 accumulate in the peripheral blood of patients with cancer and a high circulating neutrophil-to-  
69 lymphocyte ratio is known as a strong biomarker of poor prognosis in various cancers [13].  
70 Based on density gradient centrifugation, circulating neutrophils in mice model can also be  
71 classified into the low-density and high-density neutrophils (LDN and HDN) [14, 15]. LDN  
72 was associated with immunosuppressive activity promoting tumour growth while HDN was  
73 considered cytotoxic to the tumour. Neutrophils were reported to be the first immune cells  
74 recruited into mammary tissue during involution [9], although the significance of their presence  
75 is not known.

76 Estrogen is well studied on its mitogenic effect and plays essential roles in mammary  
77 ductal development. However, the studies of estrogen influence on mammary involution are  
78 scarce. In mice, a histological examination in 1970 reported that estrogen treatment retards  
79 mammary involution [16]. However, estrogen was reported to promote the regression of  
80 mammary glands in rats by up-regulating a 60K gelatinase which degrades collagen and  
81 participate in extracellular matrix remodelling [17]. Similar to the observation in rats, injection  
82 of estrogen during the dry off period in dairy cows hastened involution based on the abrupt  
83 decline of milk synthesis and secretion [18, 19]. Those early preliminary studies clearly  
84 indicate the involvement of estrogen in the modulation of mammary involution, but the pieces  
85 of evidence are limited and inconsistent among different models.

86           In this present study, we investigated the influence of estrogen on the progression of  
87   mammary involution in mice. We also evaluated the roles of neutrophils in estrogen regulation  
88   of this process in neutrophil depletion experiments. Our data show that estrogen plays a  
89   multifaceted role in the regulation of post-weaning mammary involution by enhancing  
90   inflammation, cell death, adipocyte occupancy, and tissue remodelling through both  
91   neutrophil-dependent and neutrophil-independent mechanisms. Global transcriptomic analysis  
92   revealed striking effect of estrogen on neutrophil activities that likely exert profound influence  
93   on mammary microenvironment that may have significantly impact on the development of  
94   parity-associated breast cancer.

95 **Result**

96 **Estrogen promotes inflammation, programmed cell death and adipocytes repopulation**  
97 **during post-weaning mammary involution**

98 Acute inflammation, programmed cell death, and adipocytes repopulation are the  
99 hallmarks of the acute phase of post-weaning mammary involution. To understand the roles of  
100 estrogen in mammary involution, its effect on these hallmarks were evaluated. Ovariectomized  
101 (OVX) mice at 24h post-weaning (INV D1) were treated with or without 17 $\beta$ -estradiol  
102 benzoate (E2B) for 48h. E2B caused significantly more mammary cell death, as evidenced by  
103 the increase of the number of shed cells with hyper-condensed nuclei in the lumen, a  
104 characteristic of programmed cell death (Fig. 1, Ai, and 1B, p=0.0131). This effect was  
105 associated with an increase in the number of cleaved caspase-3-positive (CC3<sup>+</sup>) mammary cells  
106 (Fig. 1, Aii, and 1B, p=0.0283). E2B also significantly increased the repopulation of adipocytes  
107 based on the staining of perilipin, a lipid droplet-associated protein [20] (Fig. 1, Aiii, and 1B,  
108 p=0.0155). Accordingly, E2B decreased the expression of milk proteins  $\beta$ -casein (*Csn2*) (Fig.  
109 1C, p=0.0187).

110 We reported previously that E2B markedly induced the expression of inflammatory  
111 genes and neutrophil infiltration [4]. We questioned if neutrophils are involved in E2B-induced  
112 cell death and adipocytes repopulation. Interestingly, neutrophil depletion had no effect on  
113 E2B-induced mammary cell death but diminished E2B-induced adipocytes repopulation (Fig.  
114 1D). The representative histological images of the effect of neutrophil depletion are shown in  
115 Suppl. Fig. 2. Taken together, we conclude that estrogen promotes mammary involution, and  
116 neutrophils are critical for estrogen-induced inflammation and adipocytes repopulation, but not  
117 for mammary cell death.

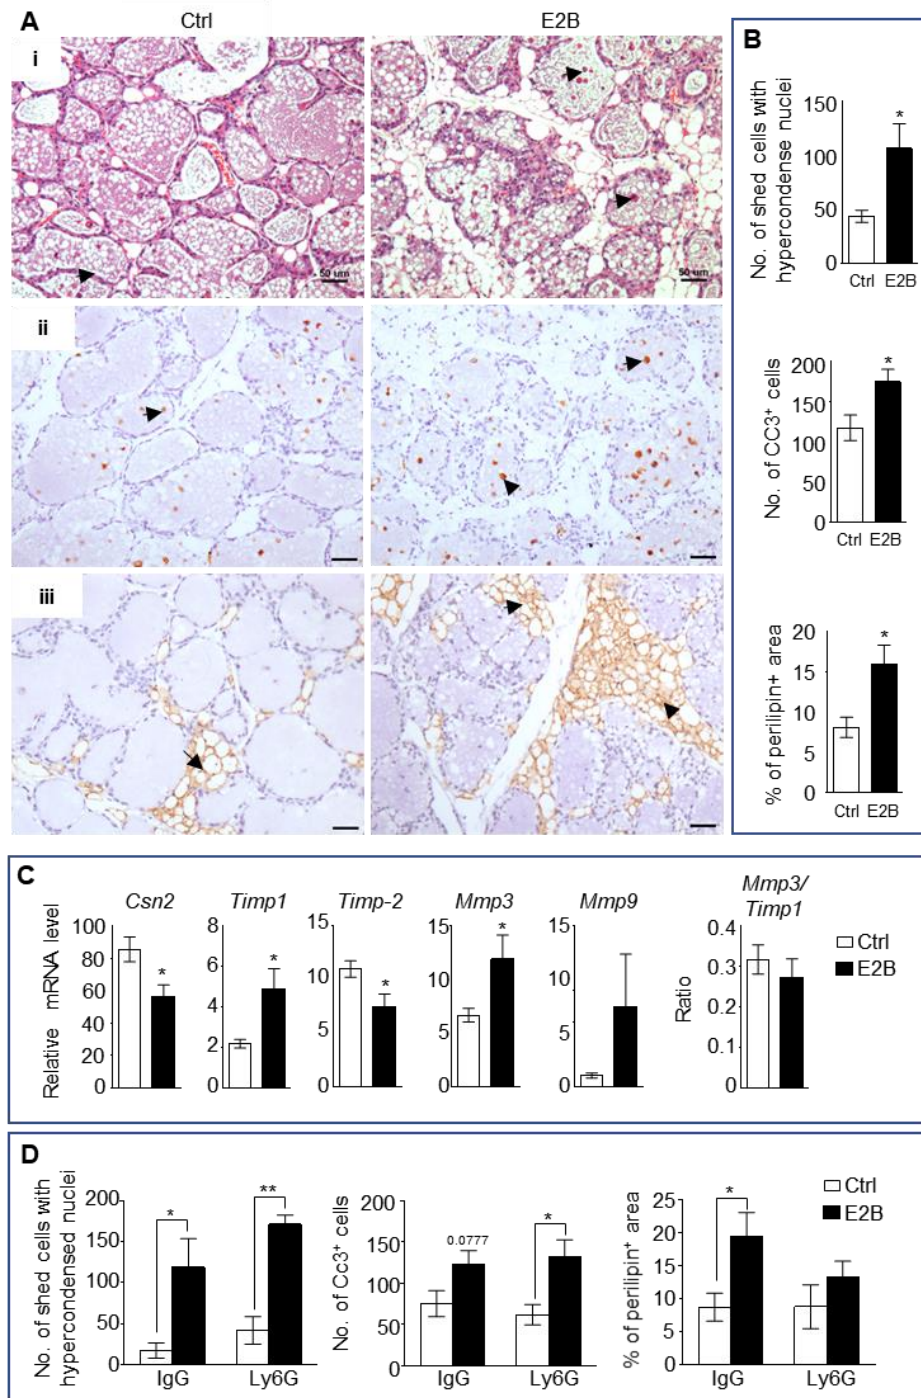

118

**Figure 1. Estrogen accelerates mammary involution.** Mice on the day of weaning (involution day 1-INV D1) were treated with vehicle control (Ctrl) or E2B for 48h before mammary tissues were collected for analysis. A, (i) H&E stained mammary tissue sections; shed cells with hyper-condensed nuclei are indicated by arrows. (ii) IHC of cleaved caspase-3 (CC3); arrows indicate CC3<sup>+</sup> cells. (iii) Perilipin IHC; arrows indicate perilipin<sup>+</sup> adipocytes. Scale bars: 50µm. B, Quantification of the number of shed cells with hypercondensed nuclei in the lumens from H&E sections (Ctrl n=9, E2B n=8), of number of CC3<sup>+</sup> cells (Ctrl n=7, E2B n=6), and of percentage of perilipin stained area (Ctrl n=7, E2B n=8). C, Gene expression of *Csn2* and tissue remodelling enzymes *Timp1*, *Timp2*, *Mmp3*, and *Mmp9* relative to *36b4* by qPCR analysis (Ctrl n=7, E2B n=6). D, Neutrophil depletion had no effect on cell shedding and number of CC3<sup>+</sup> cells, but attenuated estrogen-induced adipocytes repopulation (Ctrl+IgG n=4, E2B+IgG n=4, Ctrl+Ly6G n=3, E2B+Ly6G, n=3). Data represented as mean ± SEM.

119

120 **Majority of estrogen-regulated genes in involuting mammary tissue is mediated through**  
121 **neutrophils**

122 To elucidate the mechanism of estrogen regulation during mammary involution, RNA-  
123 Seq analysis of mammary tissue was conducted. Since estrogen has been shown to induce  
124 neutrophil infiltration in mammary tissue, the involvement of neutrophils in estrogen regulation  
125 of gene expression was also determined. OVX mice were injected with anti-Ly6G antibody  
126 (Ly6G) to deplete neutrophils at 24h post-weaning (INV D1). Mice given isotype control  
127 antibody (IgG) were used as controls. Mice were subsequently treated with or without E2B for  
128 24h. Consistent with the previous study [4], E2B induced neutrophil infiltration during  
129 mammary involution. E2B also induced an increase of mammary tissue monocytes (CD45+  
130 CD11b+ Ly6C<sup>hi</sup>), which can be considered as mammary macrophages because they have  
131 infiltrated into the tissue. Anti-Ly6G treatment reduced neutrophil (CD45+ CD11b+ Gr1<sup>hi</sup>)  
132 levels in the blood and mammary tissue by more than 95% (Suppl. Fig. 1, p<0.05). Mammary  
133 macrophages were decreased with neutrophil depletion by anti-Ly6G, although this reduction  
134 was not statistically significant (Suppl. Fig. 1B, p=0.1417). It is plausible that E2B-induced  
135 monocytes infiltration is partly mediated by neutrophils.

136 RNA-Seq data were analysed using DESeq2 [21] to identify differentially expressed  
137 (DE) genes between the different treatments. As shown in the volcano plot (Fig. 2A, top panel),  
138 a total of 1987 genes were significantly (padj<0.05) regulated by E2B in IgG groups (Fig. 2B)  
139 with very high fold changes. Of these genes, 513 genes were up-regulated, and 148 genes were  
140 down-regulated with a fold change  $\geq 2$  (Fig. 2A, top panel). Gene ontology (GO) analysis  
141 showed that estrogen regulates genes involved in diverse biological processes (Fig. 2C).  
142 Leukocyte migration, regulation of inflammatory response, and cytokine-mediated signalling  
143 are among the top biological processes regulated. E2B also regulated genes in epithelial cell  
144 proliferation, cell death, and fat cell differentiation.



145 Remarkably, neutrophil depletion eliminated 88% of estrogen-regulated genes (Fig. 2B,  
146 top panel), i.e., 1746 out of 1987 E2B-regulated genes in mammary tissue were regulated in  
147 neutrophils directly, or indirectly through regulating the activities of neutrophils.  
148 Correspondingly, 12% (241 genes) of E2B-regulated genes in mammary tissue are independent  
149 of neutrophils. It is also noteworthy that there is only one differentially regulated gene  
150 ( $p_{adj} < 0.05$ ) between IgG and Ly6G groups in the absence of estrogen (Fig. 2B, bottom panel).  
151 This could be due to the fact that the number of mammary neutrophils present in these Ctrl  
152 samples were too low (less than 1% of the total live cells in FACS analysis) to account for any  
153 differences in gene expression. Consistent with the function of neutrophils, the GO terms  
154 including leukocyte migration, inflammatory response, cytokines and chemokines related  
155 pathways, and fat cell differentiation that were regulated by E2B were all eliminated in  
156 neutrophil depleted samples (Fig. 2D). On the other hand, GO terms such as epithelial cell  
157 proliferation and developmental growth persisted in neutrophil-depleted samples suggesting  
158 that their stimulation by E2B are independent of neutrophils (Fig. 2C, 2D).

159 Taken together, global gene expression analysis of mammary tissue demonstrates that  
160 estrogen regulates genes in a plethora of biological processes during post-weaning mammary  
161 involution, and 88% of estrogen-regulated genes are mediated through neutrophils. Therefore,  
162 the E2B-induced pro-inflammatory microenvironment during mammary involution is  
163 primarily due to its regulation of neutrophil activities, which play a significant role in post-  
164 weaning mammary involution. In the subsequent studies, we investigated the mechanism of  
165 estrogen-induced neutrophil infiltration, mammary cell death, and adipocytes repopulation  
166 during post-weaning mammary involution.

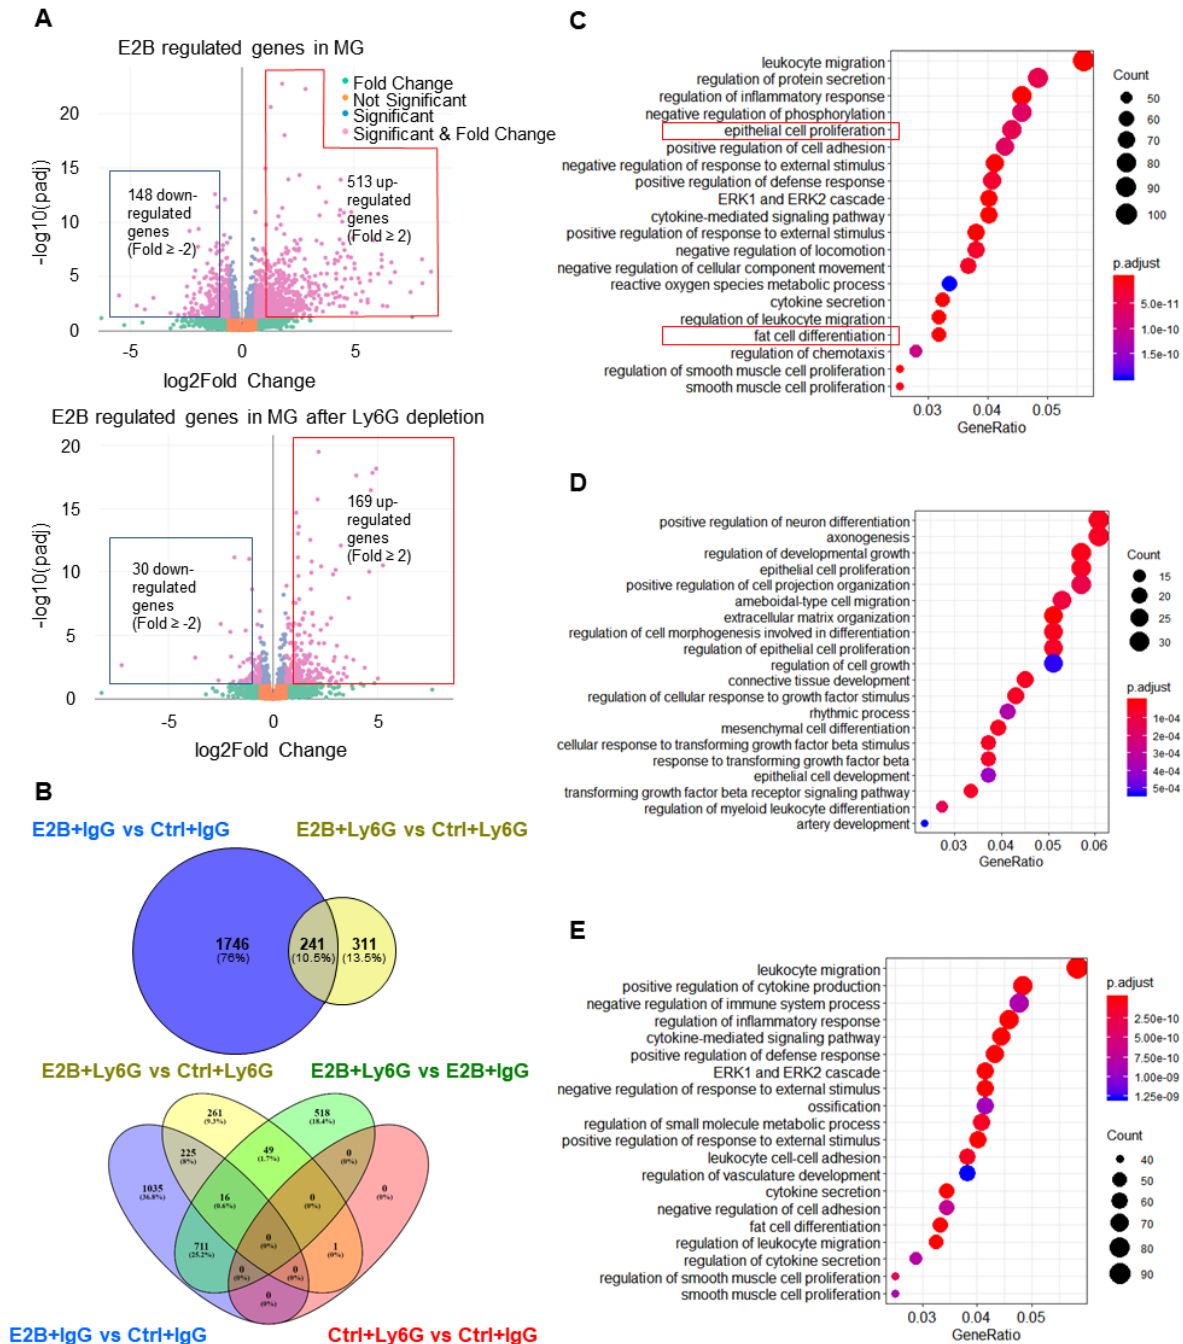

167

168

**Figure 2. Estrogen regulates a multitude of neutrophil-dependent and –independent biological processes in involuting mammary gland.** Mice at INV D1 were treated with anti-Ly6G antibody (Ly6G) or isotype control (IgG). 24h later, they were treated with vehicle control (Ctrl) or E2B for 24h (Ctrl+IgG n=3, Ctrl+Ly6G n=3, E2B+IgG n=3, E2B+Ly6G n=3). RNA-Seq data were processed and analysed with DESeq2 followed by GO over-representation analysis. A, Volcano plot for the differentially expressed E2B regulated genes in mammary gland (MG) from IgG- and Ly6G-treated animals. B, Venn diagram for the differentially expressed genes identified from the DESeq2 analysis of the RNA-Seq data. C, Top 20 Gene Ontology (GO) terms for E2B regulated genes in MG without neutrophil depletion. D, Top 20 GO terms for the E2B regulated genes in MG after neutrophil depletion. E, Top 20 GO terms for E2B regulated genes are lost as a result of neutrophil depletion.

169 **Estrogen-induced *Cxcr2* signalling in neutrophils plays a key role in mammary neutrophil**  
170 **infiltration**

171 Based on the GO over-representation analysis, 63 E2B-regulated genes with fold  
172 change  $\geq 3$  were associated with leukocyte migration and inflammation (Fig. 3A). All 63 genes  
173 were no longer E2B-regulated after neutrophil depletion (in Ly6G group). This suggests that  
174 the regulation of inflammation by estrogen is primarily exerted through neutrophils. Consistent  
175 with the previous report [4], S100 calcium-binding protein A8 (*S100a8*) and A9 (*S100a9*) were  
176 all induced by E2B in isolated mammary neutrophils using magnetic beads (Dynabeads®)  
177 coupled to anti-Ly6G antibody (Fig. 3B, *S100a8*,  $p=0.0079$ ; *S100a9*,  $p=0.0035$ ). C-X-C motif  
178 chemokine receptor 2 (*Cxcr2*), the receptor for C-X-C motif chemokine ligand 1 and 2 (*Cxcl1*  
179 and *Cxcl2*) which was also previously demonstrated to be induced by estrogen in mammary  
180 neutrophils [4], was also significantly up-regulated (Fig. 3B,  $p=0.0139$ ). Aconitate  
181 decarboxylase 1 (*Acod1*), triggering receptor expressed on myeloid cells 1 (*Trem1*), triggering  
182 receptor expressed on myeloid cells 3 (*Trem3*), and interleukin 1 beta (*Il1b*) that displayed high  
183 fold induction were also validated with qPCR in isolated neutrophils (Fig. 3B, *Acod1*,  $p=0.0845$ ;  
184 *Trem1*,  $p=0.0252$ ; *Trem3*,  $p=0.0181$ ; *Il1b*,  $p=0.0527$ ). The results confirm that the up-  
185 regulation of inflammatory genes was a result of estrogen induction in mammary neutrophils.  
186 Another interesting estrogen-regulated gene is myocardial infarction associated transcript 2  
187 (*Mirt2*; Fig. 3B,  $p=0.008$ ), which was found to be one of the highest E2B-regulated gene in the  
188 RNA-Seq data. *Mirt2* is a lipopolysaccharides (LPS)-induced long non-coding RNA (lncRNA)  
189 in macrophages and was reported to be a negative regulator of LPS-induced inflammation both  
190 *in vivo* and *in vitro* [22]. Thus, *Mirt2* regulation by E2B in neutrophils indicates its involvement  
191 in the moderation of the inflammatory response during mammary involution.

192 Next, the study investigated the mechanism of estrogen-induced neutrophils infiltration.  
193 S100A8, S100A9, CXCL1, and CXCL2 are known neutrophil chemoattractants that promote

194 neutrophil migration during inflammation [23-25]. S100A8 and S100A9 are small calcium-  
195 binding proteins that activate calcium-dependent signalling through receptor for advanced  
196 glycation endproducts (RAGE) or toll-like receptor 4 (TLR4). Paquinimod (PAQ) is a  
197 derivative of quinoline-3-carboxamide that has been shown to inhibit S100A9 activity through  
198 binding with S100A9 [26, 27]. The binding inhibits S100A9 dimerization or the formation of  
199 heterodimer with S100A8, thereby preventing the activation of RAGE or TLR4. To test the  
200 role of S100A9 in estrogen-induced neutrophil infiltration, PAQ was synthesized following the  
201 reported method [28] and tested whether it inhibits E2B-induced neutrophil infiltration by  
202 treating OVX mice with E2B or E2B+PAQ at INV D1 for 48h in a pilot experiment. Flow  
203 cytometry analysis (Suppl. Fig. 3A) showed that E2B+PAQ treatment resulted in an increase  
204 in mammary neutrophils (CD45<sup>+</sup> CD11b<sup>+</sup> Ly6G<sup>+</sup>, p=0.0238) and macrophages (CD45<sup>+</sup>  
205 CD11b<sup>+</sup> Ly6C<sup>hi</sup>, p=0.0242) when compared to E2B treated samples. Consistently, qPCR  
206 analysis of the treated mammary tissues also revealed a significant increase in pro-  
207 inflammatory markers such as *Cxcl2* (p=0.0124), *S100a8* (p=0.0233), *S100a9* (p=0.0161), and  
208 C-type lectin domain family 4, member e (*Clec4e*; p=0.0186) (Suppl. Fig. 3C). It is not clear  
209 if PAQ has a yet to be characterized functional property that induces neutrophil infiltration, but  
210 these results seem to suggest that S100A8/A9 were not significantly involved in the E2B-  
211 induced neutrophil infiltration.

212 Subsequently, we explored the involvement of CXCR2 signalling in E2B-induced  
213 neutrophil recruitment because both *Cxcr2* and its ligands *Cxcl1* and *Cxcl2* were both  
214 significantly up-regulated by E2B in neutrophils. OVX mice were treated with Ctrl or E2B at  
215 INV D1 in the presence of CXCR2 antagonist SB225002 [29], or vehicle control DMSO for  
216 48h. To take into consideration the large variations between experiments, the percentages of  
217 infiltrated mammary neutrophils (CD45<sup>+</sup> CD11b<sup>+</sup> Ly6G<sup>+</sup>) were presented as fold change over  
218 the Ctrl+DMSO group. As shown in Fig. 3Ci, E2B treatment alone without the antagonist

219 (E2B+DMSO) lead to an expected 1.57-fold increase ( $p=0.0082$ ) in mammary neutrophils as  
220 compared to the Ctrl+DMSO. E2B+SB225002 treatment caused a 1.26-fold reduction in  
221 mammary neutrophils when compared to the E2B+DMSO group ( $p=0.0508$ ). Quantification  
222 of the number of infiltrated mammary neutrophils within a  $20\text{mm}^2$  area of stained mammary  
223 tissue also showed a significant reduction of neutrophil infiltration within mammary tissue (Fig.  
224 3Cii,  $p=0.0369$ ). qPCR analysis of the mammary tissue samples showed that the E2B-induced  
225 pro-inflammatory markers such as *Cxcl2*, *S100a9*, *Clec4d*, and *Clec4e* were all significantly  
226 reduced with E2B+SB225002 treatment compared with E2B+DMSO treatment (Fig. 3D, *Cxcl2*,  
227  $p=0.0279$ ; *S100a9*,  $p=0.0199$ ; *Clec4d*,  $p=0.0051$ ; *Clec4e*,  $p=0.0183$ ). This is consistent with  
228 SB225002-induced inhibition of neutrophil infiltration because these genes are estrogen-  
229 induced in neutrophils. Collectively, the data showed that the E2B-induced activation of  
230 CXCL2-CXCR2 axis in neutrophils plays a pivotal role in estrogen-induced neutrophil  
231 recruitment.

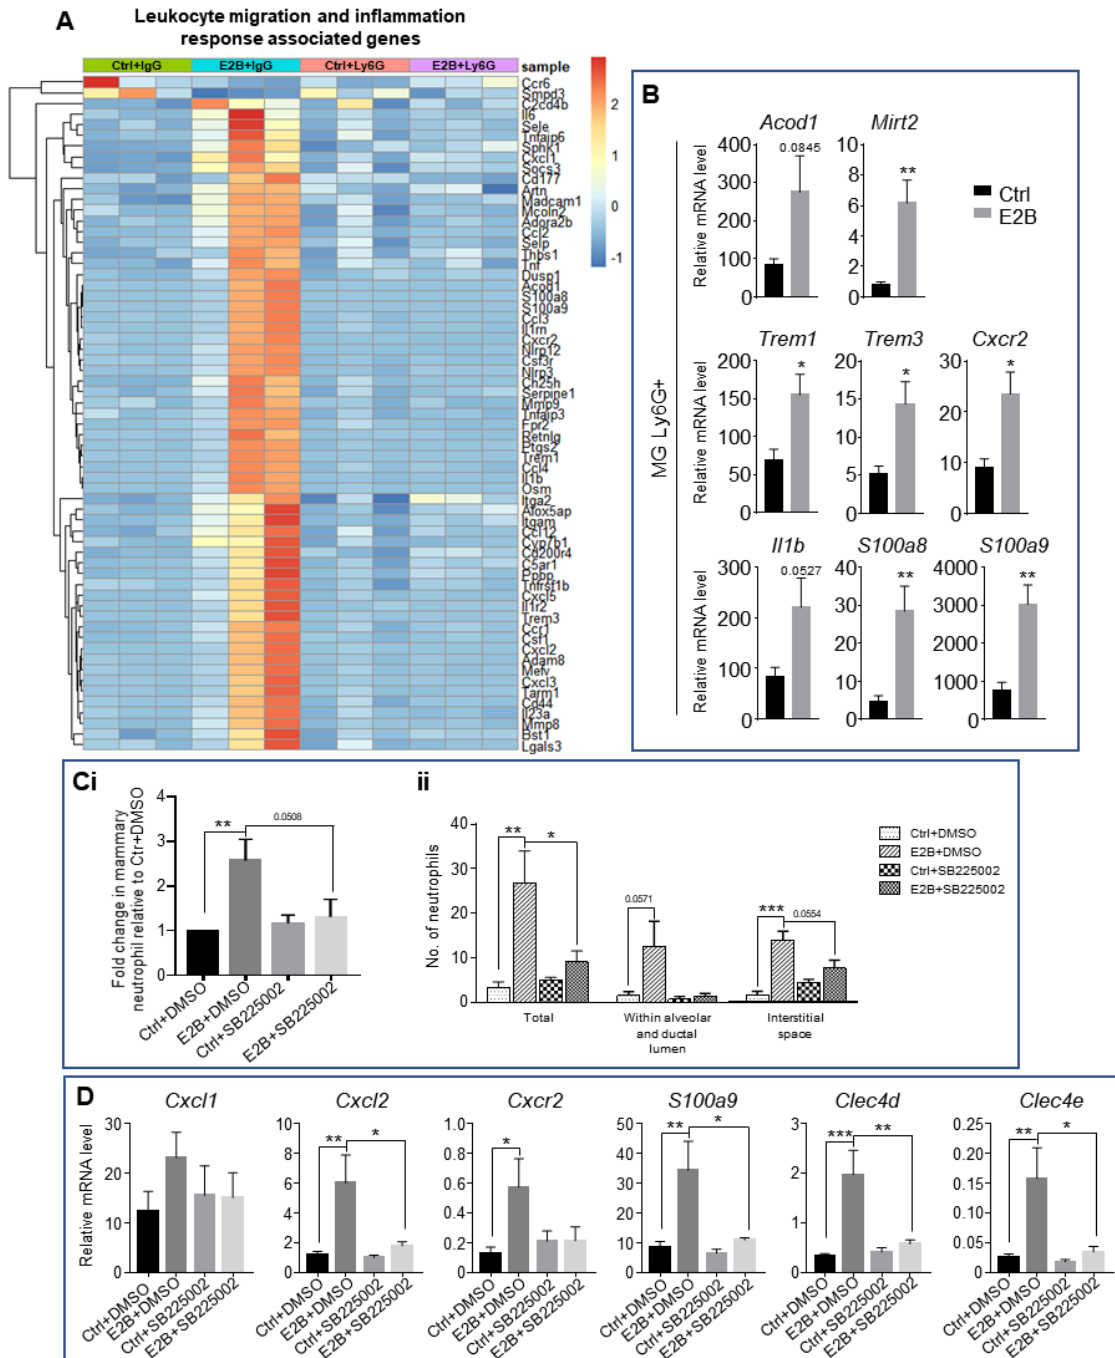

232

**Figure 3. Estrogen-induced *Cxcr2* signalling in neutrophils plays a key role in neutrophil infiltration into the involuting mammary gland.** A, Heatmap representation of estrogen-regulated genes associated to leukocyte migration and inflammation in neutrophils ( $\geq 3$  and  $\leq -3$ -fold); Experiment is conducted according to the description in Fig. 2. B, qPCR analysis of estrogen-regulated expression of *Acod1*, *Mirt2*, *Trem1*, *Trem3*, *S100a9*, *S100a8*, *Cxcr2*, and *Il1b* relative to *Gapdh* in isolated mammary neutrophils following treatment with or without E2B for 24h (Ctrl n=5, E2B n=5). C-D, E2B-induced *Cxcr2* in neutrophils is critical for E2B-induced neutrophil infiltration. Mice at INV D1 were treated with Ctrl or E2B in the absence or presence of CXCR2 inhibitor SB225002 for 48h; C, SB225002 reduces E2B-induced mammary neutrophil (CD45+ CD11b+ Ly6G+) by flow cytometry analysis (Ci) (Ctrl+DMSO n=7, E2B+DMSO n=7, Ctrl+SB225002 n=7, E2B+SB225002 n=6), and the number of infiltrated neutrophils in 20mm<sup>2</sup> of mammary sections (Cii) (Ctrl+DMSO n=4, E2B+DMSO n=3, Ctrl+SB225002 n=3, E2B+SB225002 n=3); D, SB225002 reduces E2B-induced *Cxcl2*, *Cxcr2*, *S100a9*, *Clec4d*, and *Clec4e* expression in the involuting gland (Ctrl+DMSO n=7, E2B+DMSO n=6, Ctrl+SB225002 n=7, E2B+SB225002 n=5). Data represented as mean  $\pm$  SEM.

233 **Estrogen-induced adipocyte repopulation is associated with the induction of adipogenic**  
234 **and tissue remodelling genes through neutrophils**

235 Mammary adipocytes regress during pregnancy and lactation as the mammary  
236 epithelial proliferate and differentiate to fill up the mammary fat pad. Adipocytes expansion or  
237 repopulation is a hallmark of post-lactational mammary involution. Fig. 1 shows that estrogen  
238 significantly induces adipocyte repopulation during mammary involution, and neutrophil  
239 depletion attenuates it. RNA-Seq data were further scrutinized and E2B-induced genes  
240 associated with fat cell differentiation were identified (Fig. 4A). Intriguingly, E2B down-  
241 regulated the expression of *Adipoq*, *Pparg*, and *Lpl* in the IgG group, all of which are positive  
242 regulators of adipogenesis. However, E2B also up-regulated some of the upstream regulators  
243 of adipogenesis, such as early growth response 2 (*Egr2*; p=0.0001), adipogenin (*Adig*;  
244 p=0.0372), CCAAT/enhancer binding protein (C/EBP), beta (*Cebpb*; p=0.0054), and  
245 CCAAT/enhancer binding protein (C/EBP), delta (*Cebpd*; p=0.0834), which were validated by  
246 qPCR analysis (Fig. 4B), except for *Cebpd* up-regulation which did not achieve statistical  
247 significance. In contrast, neutrophil depletion abolished E2B-induced up-regulation of these  
248 genes (*Egr2*, p=0.0798; *Adig*, p=0.1542; *Cebpb*, p=0.7571).

249 ECM remodelling also plays a key role in adipocyte repopulation during mammary  
250 involution [30]. GO over-presentation analysis showed 43 ECM organization associated genes  
251 with fold regulation  $\geq$  2-fold (Suppl. Fig. 4). Six of the down-regulated genes (e.g. *Ecm2*,  
252 *Mmp11*, *Col9a1*) were not affected by neutrophil depletion. On the other hand, 22 of the 37  
253 ECM-related genes induced by E2B were reduced with neutrophil depletion (Fig. 4C). Since  
254 matrix metalloproteinases (MMPs) are strongly induced in obese adipose tissue and modulate  
255 adipocytes differentiation [31], the expression of *Mmp3*, 8, 9, and 19 were validated by qPCR.  
256 *Mmp3* (p=0.0107) and 19 (p=0.0098) were significantly up-regulated by E2B in the IgG group,  
257 and the up-regulation of *Mmp3* was abolished or attenuated with neutrophil depletion

258 (p=0.9353) while *Mmp19* was not affected (p=0.0167) (Fig. 4D). Although the expression level  
259 of *Mmp8* was approximately 20 times higher with E2B treatment when compared to Ctrl in the  
260 IgG group, it was not statistically significant (Fig. 4D, p=0.0717). This was likely due to  
261 considerable variation in neutrophil numbers in these samples as the expression of MMP8 was  
262 reported to occur mainly in neutrophils [32]. On the other hand, no significant difference with  
263 E2B treatment was observed in *Mmp9* (IgG, p=0.1083; Ly6G, p=0.7036). It should be noted  
264 that cytokines *Il6* and *Tnf* were also induced by E2B but both have been reported to inhibit  
265 adipogenesis [33, 34]. Hence E2B induced both pro- and anti-adipogenic factors, and the  
266 outcome of estrogen-induced adipocytes repopulation could be the result of a balanced act of  
267 these genes.

268         Since adipogenesis genes induced by estrogen appears to be mediated through the  
269 estrogen-regulated neutrophil activity, we determined the effect of neutrophil depletion by the  
270 Ly6G antibody on adipocytes repopulation in the intact (non-OVX) mice during mammary  
271 involution. Mice were given daily injection from INV D1 and mammary gland collected for  
272 immunostaining of perilipin at INV D3 (72h post-weaning) showed no effect of the Ly6G  
273 antibody (Fig. 4G, p=0.3737 and Suppl. Fig. 5). However, there was a significant reduction in  
274 adipocytes repopulation with neutrophil depletion at INV D4 (Fig. 4G, p=0.0077, and Suppl.  
275 Fig. 5). The data seems to suggest that neutrophils are involved in adipocytes repopulation  
276 during mammary involution normally but the effect is limited to a specific time window when  
277 the levels of neutrophil infiltration is high [9].



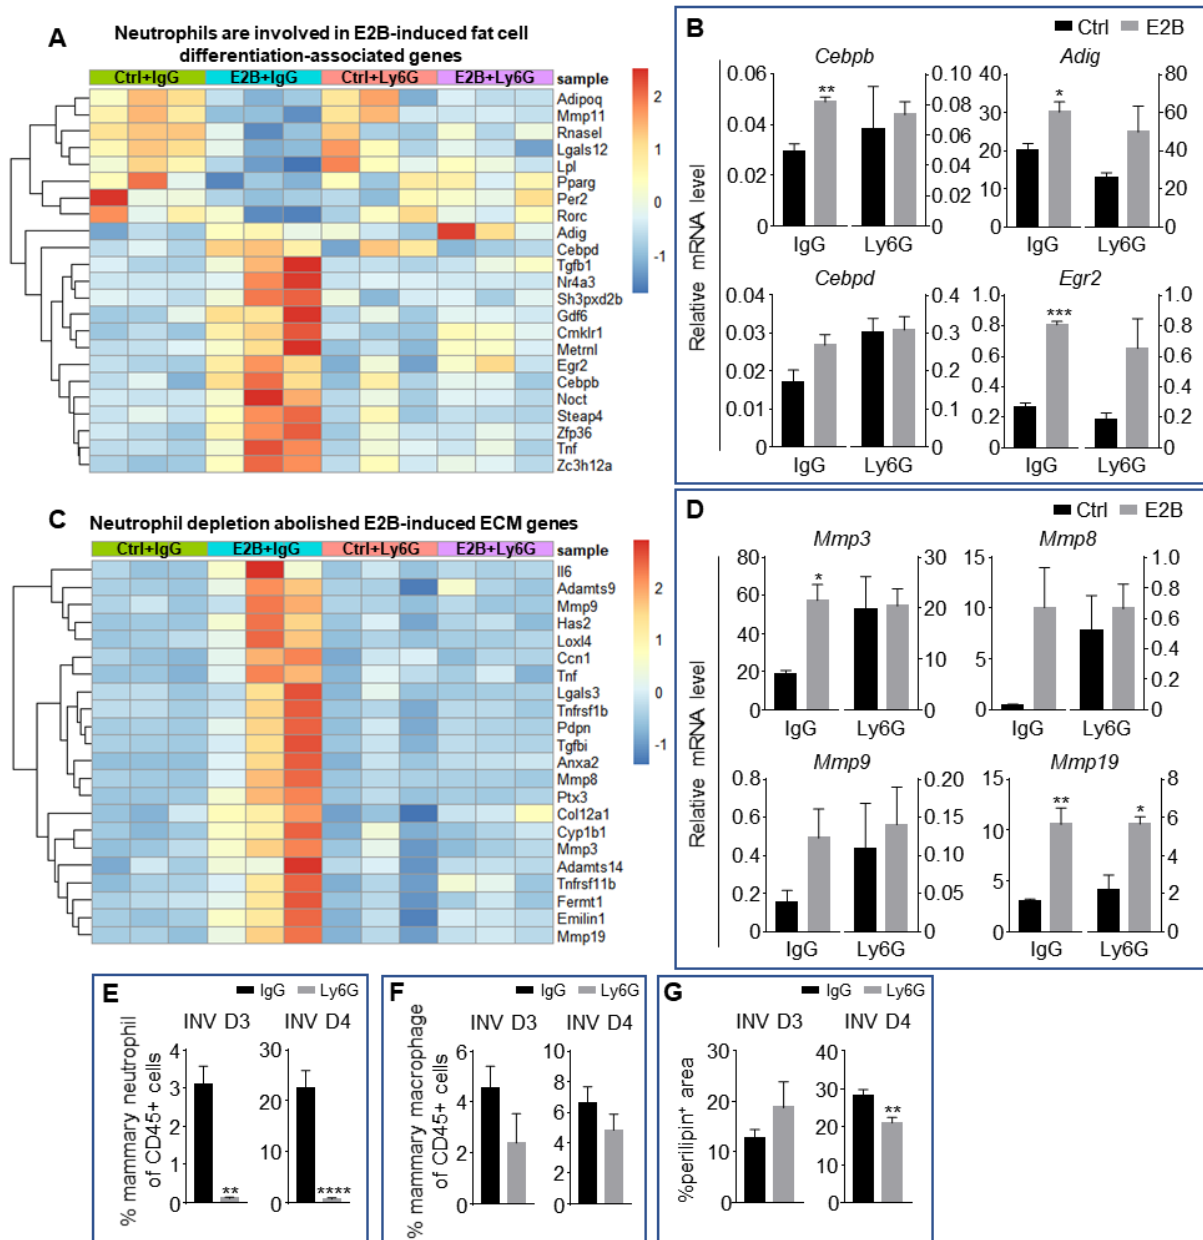

278

279

**Figure 4. Estrogen-induced adipocyte repopulation is associated with induction of adipogenic and tissue remodelling genes in neutrophils.** A, Heatmap representation of genes associated to fat cell differentiation identified from the GO over-representation analysis ( $\geq 1.5$  and  $\leq -1.5$ -fold); Experiment is conducted according to the description in Fig. 2; B, Gene expression of adipogenesis genes *Adig*, *Egr2*, *Cebpb*, and *Cebpd* relative to *36b4* by qPCR analysis. C, Heatmap representation of genes associated to extracellular matrix organization identified from the GO over-representation analysis ( $\geq 2$  and  $\leq -2$ -fold); Section of heatmap replotted from Suppl. Fig. 4; Experiment is conducted according to the description in Fig. 2; D, Gene expression of tissue remodelling genes *Mmp3*, *Mmp8*, *Mmp9*, and *Mmp19* relative to *36b4* by qPCR analysis (Ctrl+IgG n=3, Ctrl+Ly6G n=3, E2B+IgG n=3, E2B+Ly6G n=3). E, Non-OVX mice were treated daily with either anti-Ly6G antibody (Ly6G) or isotype control (IgG) at 24h post-weaning (INV D1); Flow cytometry analysis of mammary neutrophils (CD45+ CD11b+ Gr1<sup>hi</sup>) from mice treated with IgG or Ly6G; F, Flow cytometry analysis of mammary macrophages (CD45+ CD11b+ Ly6C<sup>hi</sup>) from mice treated with IgG or Ly6G; G, Quantification of percentage of perilipin stained area at INV D3 (IgG n=3, Ly6G n=4) and INV D4 (IgG n=10, Ly6G n=9). Data represented as mean  $\pm$  SEM.

## 280 **Estrogen accelerates lysosomal-mediated programmed cell death during involution**

281 Mammary epithelial cells undergo LM-PCD during the early stage of involution as  
282 lysosomes in the mammary cells undergo membrane permeabilization, releasing lysosomal  
283 proteases into the cytosol, triggering apoptosis independent of executioner caspases such as  
284 caspase 3, 6, and 7 [35-37]. Signal transducer and activator of transcription 3 (STAT3) has  
285 been shown to be a regulator for LM-PCD during involution by inducing the expression of  
286 lysosomal proteases cathepsin B (CTSB) and L (CTSL), while down-regulating their  
287 endogenous inhibitor Spi2A [36].

288 Despite its well-known function in stimulating mammary growth, estrogen significantly  
289 enhanced cell death during the acute phase of mammary involution (Fig. 1A and 1B,  $p < 0.05$ ).  
290 Since both RNA-Seq analysis and qPCR demonstrated E2B up-regulation of *Ctsb* expression  
291 (Fig. 5A, IgG,  $p = 0.0163$ ; Ly6G,  $p = 0.0182$ , and Suppl. Fig. 6), we evaluated the protein levels  
292 of cathepsins. Indeed, the pro and active form (sc, single-chain) of CTSB were significantly  
293 up-regulated (pro-CTSB,  $p = 0.0358$ ; sc-CTSB,  $p = 0.0101$ ) in the E2B-treated mammary gland.  
294 Furthermore, the sc-form of cathepsin D (CTSD) and CTSL were also significantly up-  
295 regulated by E2B (Fig. 5B, sc-CTSD,  $p = 0.0222$ ; sc-CTSL,  $p = 0.0385$ ), although the levels of  
296 pro-CTSD and CTSL were unchanged. Since E2B had no effect on the expression of *Ctsd* and  
297 *Ctsl* (data not shown), the increase of the sc-form of CTSD and CTSL can be explained by the  
298 up-regulation of CTSB which catalyses the removal of the N-terminal propeptide from itself  
299 and from CTSD and CTSL, leading to an increase in active forms of cathepsins B, D, and L  
300 [38, 39]. Consistent with the lack of neutrophil influence on E2B-induced cell death, neutrophil  
301 depletion had no effect on E2B-induced increase of active form of CTSB (Fig. 5C).

302 E2B also significantly induced the expression of tumour necrosis factor (*Tnf*) (Fig. 5A,  
303 IgG,  $p = 0.0161$ ; Ly6G,  $p = 0.0343$ , and Suppl. Fig. 6), which is a known upstream activator of

304 STAT3. However, E2B did not affect the levels of phosphorylated and total STAT3 (Fig. 5B).  
305 This suggests that the up-regulation of *Ctsb* expression by E2B is a direct event independent  
306 of STAT3 activation. Furthermore, E2B also up-regulated the expression of BH3 interacting  
307 domain death agonist (*Bid*), independent of neutrophils (Fig. 5A, IgG,  $p=0.0119$ ; Ly6G,  
308  $p=0.0248$ , and Suppl. Fig. 6). *Bid* is a well-established pro-apoptotic marker, and its  
309 overexpression has been reported to promote cell death [40, 41].

310           Physiological LM-PCD during mammary involution is associated with the leakage of  
311 lysosomal cathepsins into the cytosol. We further tested if estrogen-induced increase of active  
312 CTSB and CTSL protein is associated with an increase of cytosolic cathepsins by lysosome  
313 and cytosol fractionation. Lysosome-associated membrane protein 2 (LAMP2) was used as a  
314 lysosomal marker (Fig. 5D). Consistently, E2B-induced increases of the sc-form of CTSB and  
315 CTSL occurred mostly in the cytosolic fraction (Fig. 5D). These findings further support the  
316 notion that E2B promotes mammary cell death by increasing the activity of lysosomal proteases  
317 CTSB, CTSD, and CTSL under the cellular condition of mammary involution.

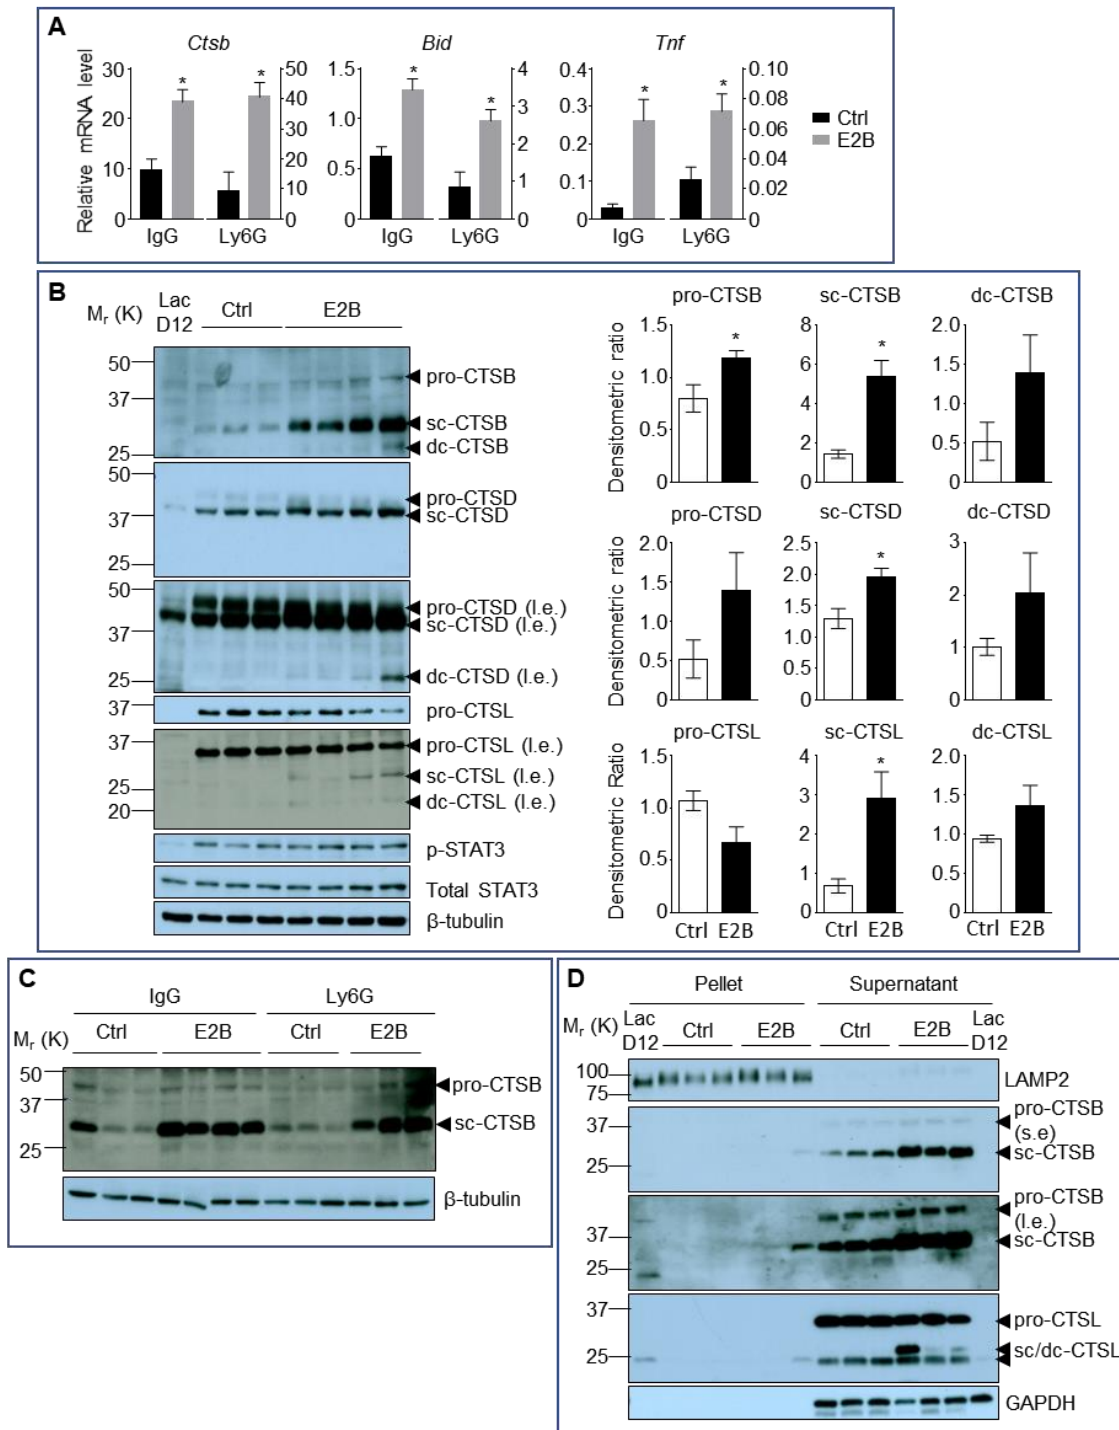

318

319

**Figure 5. Estrogen stimulates the activity of lysosomal proteases that are critical for LM-PCD.** A, qPCR validation of E2B-induced expression of *Bid*, *Ctsb*, and *Tnf* relative to *36b4* identified from DESeq2 analysis (Suppl. Fig. 6) (Ctrl+IgG n=3, Ctrl+Ly6G n=3, E2B+IgG n=3, E2B+Ly6G n=3). Mice on INV D1 were treated with Ctrl or E2B for 48h before MG were collected for analysis; B, Western blots of cathepsin B, D and L proteins (sc, single-chain; dc, heavy chain of the double-chain form) in mammary tissue of 48h treatment (Ctrl n=3, E2B n=4). C, Western blotting analysis shows that depletion of neutrophils did not affect estrogen-induced increase of single-chain (sc) and double-chain (dc) forms of CTSB (Ctrl+IgG n=3, E2B+IgG n=4, Ctrl+Ly6G n=3, E2B+Ly6G n=3). D, Effect of E2B on protein levels of lysosomal and cytosolic CTSB and CTSL proteins after subcellular fractionation. LAMP2 is used as a lysosomal marker (s.e., short exposure; l.e., long exposure) (Ctrl n=3, E2B n=3). Data are presented as Mean ± SEM.

320 Estrogen-induced cell death under physiological condition is hitherto unreported. We  
321 hypothesized that pro-inflammatory condition may prime estrogen-induced cell death during  
322 the acute phase of mammary involution. As wild-type MCF7 does not express caspase-3 [42],  
323 the hypothesis was tested in an *in vitro* model using MCF7-caspase3(+) breast cancer cell line  
324 [43]. The idea was to recapitulate estrogen-induced cell death during mammary involution  
325 using the pro-inflammatory cytokine TNF $\alpha$ . MCF7-caspase3(+) cells were first treated with  
326 TNF $\alpha$  or vehicle control for 1h. This was followed by treatment with 17 $\beta$ -estradiol (E2) or  
327 vehicle control for 24h before the cells were stained with propidium iodide (PI) for analysis  
328 with flow cytometer. Cells undergoing programmed cell death exhibit increased membrane  
329 permeability and hence will stain positive for PI. As shown in Fig. 6A, increasing concentration  
330 of TNF $\alpha$  from 2ng/ml to 10ng/ml led to a dose-dependent increase in the percentage of dead  
331 cells (p<0.01). As expected, E2B treatment alone did not cause cell death. However,  
332 E2B+TNF $\alpha$  treatment significantly enhanced the percentage of dead cells compared to TNF $\alpha$   
333 treatment alone at doses of 5ng/ml (p=0.0104) and 10ng/ml (p=0.0007). Expectedly, TNF $\alpha$   
334 induced increases in p-STAT3 and cleaved poly-ADP ribose polymerase (PARP) protein as  
335 compared to the vehicle-treated controls (Fig. 6B). E2B+TNF $\alpha$  increased the levels of p-  
336 STAT3 and cleaved PARP significantly compared to TNF $\alpha$  treatment alone (Fig. 6B and 6C,  
337 p-STAT3, p=0.0404; cleaved PARP, p<0.0001). These molecular changes are consistent with  
338 a greater level of cell death induced by the combined treatment of E2B and TNF $\alpha$ . Together,  
339 the *in vitro* data support the notion that pro-inflammatory cytokines such as TNF $\alpha$  primes the  
340 death-inducing effect of estrogen. However, the increased p-STAT3 is not associated with  
341 increases of active CTSD and CTSB (data not shown), suggesting that estrogen-induced cell  
342 death in the presence of TNF $\alpha$  may not be via LM-PCD in the MCF7-caspase3(+) cells.

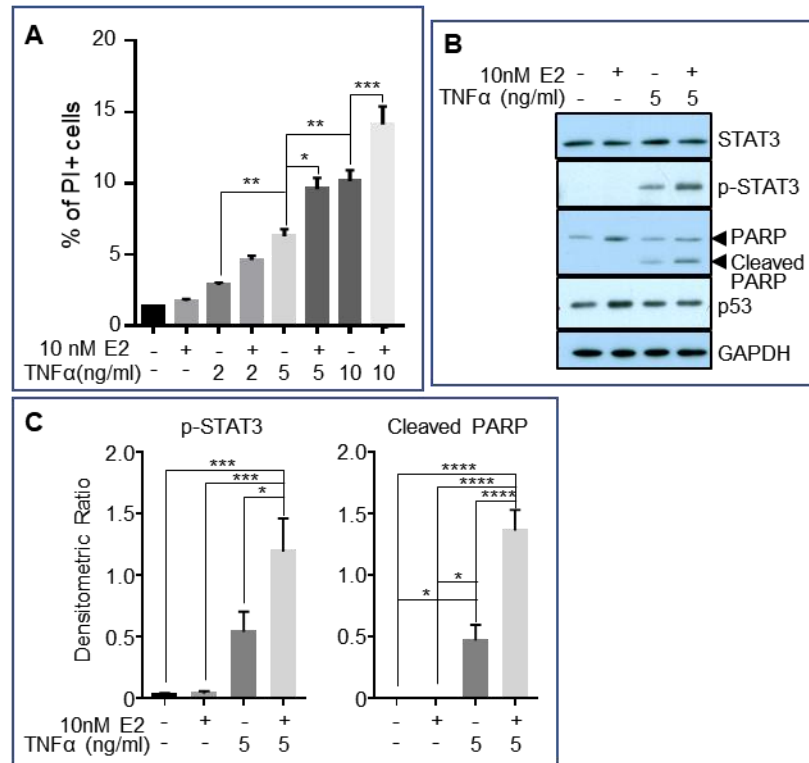

343

344

**Figure 6. Estrogen accelerates TNF $\alpha$ -induced cell death *in vitro*.** MCF7-caspase3(+) cells were treated with either vehicle control (1xPBS) or TNF $\alpha$  of varying concentrations. An hour later, cells were treated with either vehicle control (0.01% ethanol) or 10nM 17 $\beta$ -estradiol (E2) for 24h, after which they were collected for analysis. A, Flow cytometry analysis for the percentage of propidium iodide (PI)-positive cells (dead cells) after treatment (4 independent experiments with triplicates for each group). B, Representative western blotting analysis of various proteins from the treated cells. C, Densitometric analysis of protein expressions normalized against GAPDH (3 independent experiments with duplicates for each group). Data represented as mean  $\pm$  SEM.

## 345 **Estrogen remains a mitogenic hormone during mammary involution**

346           Despite its effect on mammary cell death, estrogen retains its function as a mitogen as  
347 indicated by E2B-induced expression of pro-growth genes in the RNA-Seq analysis. The up-  
348 regulation of amphiregulin (*Areg*), epiregulin (*Ereg*), and myelocytomatosis oncogene (*c-Myc*)  
349 were validated by qPCR in the IgG group (Suppl. Fig. 7, *Areg*, p=0.0448; *Ereg*, p=0.0435; *c-*  
350 *Myc*, p=0.0063) and the E2B's effects were largely unaffected by neutrophil depletion. These  
351 data provide evidence that during post-weaning mammary involution, following the massive  
352 cell death events, estrogen promotes the regeneration of the mammary gland.

## 353 **The effect of estrogen in age-matched nulliparous mammary tissue is distinct from that** 354 **undergoing mammary involution**

355           To confirm that the effect of estrogen on neutrophils and on gene regulation during  
356 mammary involution does not occur similarly in the post-pubertal mammary gland, OVX  
357 nulliparous mice were given isotype IgG the day prior to E2B treatment in order to match the  
358 IgG treatment in the involuting mice. 24h later, these animals were given either vehicle control  
359 (Ctrl) or E2B for 24h. Flow cytometry analysis of the mammary gland showed that E2B  
360 treatment resulted in a 56.33% decrease in mammary neutrophils (CD45<sup>+</sup> CD11b<sup>+</sup> Gr1<sup>hi</sup>) when  
361 compared to Ctrl (Fig. 7A, p=0.0349). E2B had no significant effect on the percentage of  
362 mammary macrophage (CD45<sup>+</sup> CD11b<sup>+</sup> Ly6C<sup>hi</sup>, p=0.2965). qPCR analysis was also  
363 performed to investigate the effect of E2B on the expression of pro-inflammatory markers and  
364 cell death-related genes. E2B significantly down-regulated *SI00a9* (p=0.0095), *Cxcl2*  
365 (p=0.0382), and *Cxcr2* (p=0.0236) while had no effect on the expression of *SI00a8*, *Clec4d*,  
366 *Il1b*, and *Trem3* (Fig. 7C). The expression of *Clec4e*, *Mirt2*, and *Trem1* were also analysed but  
367 had no amplification in the qPCR reactions. These observations contrast with that in the  
368 involuting mammary gland where the expression of all these pro-inflammatory genes were up-

369 regulated with E2B treatment. As for the cell death-related genes, E2B up-regulated *Ctsb*  
 370 ( $p=0.0166$ ), consistent with the understanding that *Ctsb* is an ER target gene [44]. However,  
 371 E2B had no effect on the expression of *Bid* while *Tnf* displays no amplification in the qPCR  
 372 reaction due to the low level of expression (Fig. 7D). Hence, unlike its effect during mammary  
 373 involution, E2B exerts an anti-inflammatory effect on the mammary gland of nulliparous mice.

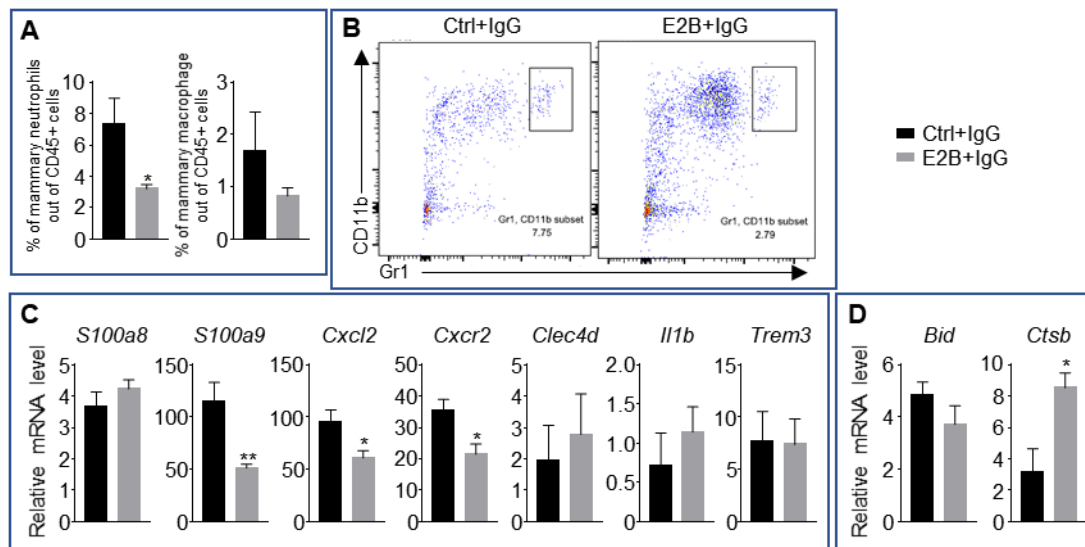

374

**Figure 7. Estrogen regulation of inflammatory and apoptotic genes in nulliparous mammary tissue.** OVX nulliparous mice were treated with isotype control (IgG). 24h later, they were treated with either Ctrl or E2B for 24h. A, Flow cytometry analysis of mammary neutrophils ( $CD45^+ CD11b^+ Gr1^{hi}$ ) and macrophages ( $CD45^+ CD11b^+ Ly6C^{hi}$ ). B, Representative flow cytometry dot plot for the percentage of neutrophils in the MG. C, Gene expression of pro-inflammatory genes *S100a8*, *S100a9*, *Cxcl2*, *Cxcr2*, *Clec4d*, *Il1b*, and *Trem3* relative to *36b4* by qPCR. D, Gene expression of cell death associated genes *Bid* and *Ctsb* relative to *36b4* by qPCR. Ctrl+IgG n=5, E2B+IgG n=5. All data are presented as mean  $\pm$  SEM.

375



## 376 **Discussion**

377           This is a comprehensive study of the biological function of estrogen during the acute  
378 phase of mammary involution. There are three salient features of the findings. First, estrogen  
379 accelerates mammary involution by exacerbating mammary inflammation, programmed  
380 mammary cell death, and adipocytes repopulation. These effects were found to be mediated  
381 through distinct mechanisms. Second, RNA-Seq analysis revealed the remarkable extent of  
382 estrogen regulation of neutrophil activity. Neutrophil depletion eliminated 88% of estrogen-  
383 regulated genes in mammary tissue, even though neutrophils account for less than 5% and 1%  
384 (in estrogen-treated and control respectively) of the total number of live cells in the mammary  
385 tissue tested. Functional analysis showed that neutrophils are the primary mediators of  
386 estrogen-induced inflammation, neutrophil infiltration, and adipocyte repopulation. The  
387 exceptional impact of estrogen on neutrophil activities would conceivably have a significant  
388 influence on the mammary tissue microenvironment. This affirms the pivotal roles of  
389 neutrophils in mediating the pro-tumoral effect of estrogen on ER-negative tumour  
390 development in mammary tissue during involution [4]. Third, estrogen promotes mammary  
391 LM-PCD independent of neutrophils by inducing the expression and activity of lysosomal  
392 cathepsins and other pro-apoptotic markers such as *Bid* and *Tnf*. Notably, all these effects of  
393 estrogen are unique to the mammary tissue during post-weaning involution, signifying the  
394 plasticity of estrogen action depending on the tissue microenvironment.

### 395 **Plasticity of estrogen action in neutrophils**

396           In sharp contrast to the effect on neutrophils during mammary involution, estrogen  
397 reduced mammary neutrophil infiltration in age-matched nulliparous mice. Estrogen-regulated  
398 expression of cytokines such as *S100a9*, *Cxcl2*, and *Cxcr2* in nulliparous mice also occurs in  
399 the opposite direction as that in mice undergoing mammary involution. The observation in

400 nulliparous mice is consistent with reports that estrogen inhibits inflammation in obesity-  
401 induced mammary inflammation [45], and in *Staphylococcus aureus* infected bovine mammary  
402 epithelial cells [46]. To our knowledge, this is the first evidence of the plasticity of estrogen  
403 action on neutrophils that is shaped by the tissue microenvironment in an *in vivo* model. This  
404 suggests that there are fundamental differences in the cistrome of mammary neutrophils  
405 between these two states. It has been shown that TNF $\alpha$  can reshape the genomic action of  
406 estrogen in MCF7 cells through redistribution of NF- $\kappa$ B and FOXA1 binding across the  
407 genome [47, 48]. The inflammatory microenvironment in mammary tissue during involution  
408 may similarly trigger a global shift of ER-cistrome in mammary neutrophils so as to modify  
409 the neutrophil response to estrogen.

410 Neutrophils are known to express ER $\alpha$ , ER $\beta$ , and GPER30 [49]. ER $\alpha$  and ER $\beta$  are  
411 members of the nuclear receptor superfamily of transcription factors, whereas GPER30 is a G  
412 protein-coupled membrane receptor. We speculate that ER $\alpha$  plays a major part in regulating the  
413 gene expression in neutrophils during mammary involution based on the following evidence.  
414 First, the relative *Esr1* (ER $\alpha$ ) expression in mammary neutrophils during involution is  
415 approximately 40 times more than that in *Esr2* (ER $\beta$ ) (Suppl. Fig. 8). Second, ER $\alpha$  has been  
416 reported to mediate estrogen-induced neutrophil migration in the uterus through ER $\alpha$   
417 phosphorylation at serine 216 [50]. Third, ER $\alpha$  was also reported to mediate the effect of  
418 estrogen on myeloid-derived suppressor cells, which are mostly granulocytic cells, in  
419 stimulating tumour development in mice model [51]. The cellular factors and the signalling  
420 pathway that elicit the epigenetic changes in ER $\alpha$ -cistrome in neutrophils during mammary  
421 involution is an interesting area for future study.

## 422 **CXCL2-CXCR2 signalling is critical for estrogen-induced neutrophil infiltration**

423           Expectedly, hundreds of estrogen-regulated genes through neutrophils are linked to  
424 immune functions such as inflammatory response, chemotaxis, leukocytes adhesion and  
425 migration. Using specific CXCR2 antagonist SB225002, this study identified CXCL2-CXCR2  
426 signalling as a major pathway for estrogen to induce neutrophil infiltration. This is consistent  
427 with the up-regulation of *Cxcl2* [4], and *Cxcr2* by estrogen in neutrophils (Fig. 3B). CXCR2  
428 has been reported to be important for neutrophil infiltration in several mouse models. In an  
429 acute lung injury model, *Cxcr2* gene deletion abolished hyperoxia-induced neutrophil  
430 accumulation in the lungs [52]. In studies of reperfusion injury, inhibition of CXCR2 with  
431 repertaxin or anti-CXCR2 antibodies led to the reduction of neutrophils accumulation [53-55].  
432 The CXCR2 antagonist SB225002 has also been reported to reduce neutrophil recruitment and  
433 pro-inflammatory factor expression in LPS-induced acute lung injury [56]. Although the source  
434 of CXCL1 and CXCL2 in those studies were not clear, our data clearly indicate that estrogen-  
435 induced *Cxcl2* and *Cxcr2* in neutrophils promote neutrophil recruitment to the mammary tissue.

436           In addition, CXCL2-CXCR2 signalling likely cooperates with other estrogen-induced  
437 chemotactic factors. *Trem1* and *Trem3* are among the top estrogen-regulated genes in  
438 neutrophils (Fig. 3A). TREM1 was first identified to be selectively expressed on neutrophils  
439 and monocytes [57]. TREM3 is highly homologous to TREM1 and is believed to have  
440 overlapping function. TREM1/3-deficient mice displayed impaired neutrophil trans-epithelial  
441 infiltration into the lung when challenged with *P. aeruginosa* [58]. TREM1 was also known to  
442 amplify inflammation, as TREM1 overactivation with agonistic antibodies following LPS  
443 treatment led to the up-regulation of cytokines such as TNF $\alpha$ , MCP-1, and IL8 [57]. It is  
444 plausible that *Trem1/3* up-regulation is involved in estrogen-induced neutrophil infiltration.

## 445 **Estrogen-stimulated neutrophils play a role in adipocytes repopulation**

446 Estrogen is traditionally known to promote metabolism and inhibit adipogenesis [59].  
447 It has been reported recently that ER $\alpha$  signalling is required for the adipose progenitor identity  
448 and the commitment of white fat cell lineage [60]. The present study provides the first evidence  
449 that estrogen stimulates adipocytes repopulation during mammary involution, and the effect  
450 involves neutrophils based on several lines of evidence. First, neutrophils depletion attenuated  
451 estrogen-induced adipocytes repopulation. Second, neutrophil depletion attenuated estrogen-  
452 induced expression of *Adig*, *Egr2*, and *Cebpb* which are all known to induce adipocytes  
453 differentiation [61-65]. Third, neutrophil depletion in non-ovariectomized mice without  
454 estrogen treatment also significantly reduced adipocytes repopulation, although the effect  
455 appears to be transient (Fig. 4G). Interestingly, estrogen-induced neutrophil depletion reduced  
456 (albeit not significant) infiltrating CD45<sup>+</sup> CD11b<sup>+</sup> Ly6C<sup>hi</sup> mammary macrophages in  
457 ovariectomized mice (Suppl. Fig. 1B). Mammary macrophages are known to be critical for  
458 adipocyte repopulation during mammary involution [66]. It is plausible that estrogen-induced  
459 neutrophil recruitment facilitates macrophage infiltration which in turn contributes to  
460 adipocytes repopulation.

## 461 **Estrogen promotes LM-PCD during mammary involution**

462 The study provides the first evidence that estrogen accelerates cell death when there is  
463 ongoing LM-PCD. This is mediated by increased expression of *Ctsb*, and the cytosolic protein  
464 levels of active (cleaved) CTSB, CTSD, and CTSL (Fig. 5B). We propose the following model  
465 to explain how estrogen-induced *Ctsb* drives LM-PCD. First, increased gene expression and  
466 protein levels of CTSB lead to increased levels of activated CTSB due to heightened lysosomal  
467 activity in mammary cells with ongoing LM-PCD. The activated CTSB would further increase  
468 the cleavage and activation of CTSB, CTSD, and CTSL. CTSB can also enhance the

469 permeability of lysosomal membrane because lysosomal leakage is markedly decreased in  
470 cathepsin B-deficient cells in respond to TNF $\alpha$  treatment [67]. Hence, estrogen-induced  
471 expression of *Ctsb* triggers a chain of events, culminating in increased LM-PCD. In addition,  
472 the estrogen-induced expression of *Tnf* and *Bid* further enhance this process. Although  
473 estrogen-induced *Tnf* is not associated with increased activation of STAT3, TNF $\alpha$  has been  
474 reported to redistribute the zinc transporter ZnT2 to increase Zn in lysosomes. The high levels  
475 of Zn cause lysosomal swelling and cathepsin B release during mammary involution [68, 69].  
476 It is well known that cathepsins cleave BID to tBID and degrade antiapoptotic BCL-2  
477 homologues to execute LM-PCD [70, 71]. Increased *Bid* level would thus reinforce cathepsin-  
478 stimulated LM-PCD. Hence, estrogen-induced increases of cytosolic cathepsins together with  
479 increase of *Tnf* and *Bid* accelerate LM-PCD during mammary involution.

480 On the other hand, estrogen induction of *Ctsb* in nulliparous mice (Fig. 7D) without  
481 ongoing LM-PCD would not lead to cell death due to the lack of a permissive cellular  
482 environment. This notion is supported by the study of estrogen in MCF7-Caspase3(+) cells, in  
483 which treatment with TNF $\alpha$  primes estrogen to stimulate cell death. In contrast to the  
484 observation in involuting mammary gland in which estrogen did not increase total or pSTAT3,  
485 estrogen plus TNF $\alpha$  enhanced STAT3 phosphorylation as compared to TNF $\alpha$  alone (Fig. 6C).  
486 However, TNF $\alpha$  did not affect the levels of cathepsins significantly in MCF7-Caspase3(+) cell,  
487 and hence it unlikely induced LM-PCD. Nonetheless, the *in vitro* study demonstrates that  
488 estrogen can be primed to heighten cell death under a pro-inflammatory stimulus. Estrogen has  
489 also been reported to induce apoptosis in experimental endocrine resistance models through  
490 inducing endoplasmic reticulum stress and inflammatory response [72]. Thus, estrogen can  
491 induce cell death under certain cellular context, but the mechanisms vary.

## 492 **Conclusion**

493 In summary, the study reveals distinct novel mechanisms of estrogen action that are  
494 unique to the mammary tissue during post-weaning mammary involution (Fig. 8). Estrogen  
495 treatment intensely and extensively regulates the activity of neutrophils to elicit inflammation  
496 and adipocytes repopulation. The study identified CXCL2-CXCR2 signalling in neutrophils as  
497 the main mechanism of estrogen-induced neutrophil recruitment. Additionally, estrogen also  
498 exacerbates mammary LM-PCD by inducing the expression of *Ctsb*, *Tnf*, *Bid*, and subsequent  
499 lysosomal activation and release of CTSB, CTSD, and CTSL independent of neutrophils. At  
500 the same time, estrogen retains its function in inducing the expression of pro-growth genes to  
501 facilitate mammary regeneration for the subsequent reproduction. It should also be recognized  
502 that programmed cell death is often associated with growth, when the elimination of unwanted  
503 cells can benefit tissue remodelling and regeneration [73]. For example, it has been shown in  
504 *Drosophila* eye imaginal discs that apoptotic cells release Spi, the EGF ligand in flies, to  
505 promote the proliferation of neighbouring cells [74]. Whether estrogen-induced LM-PCD  
506 during mammary involution additionally facilitates mammary regeneration and tumour  
507 development is an interesting area for future study.

508 Both circulating and tissue neutrophils are known to undergo functional and phenotypic  
509 changes during cancer development and under other pathological conditions [14, 75]. It appears  
510 that neutrophils in the post-weaning, inflammatory involuting mammary tissue have undergone  
511 epigenetic changes that are particularly responsive to estrogen in fostering the pro-tumoral  
512 microenvironment. It is tempting to speculate that neutrophils in inflammatory breast cancer  
513 also undergo similar epigenetic changes that are responsive to the pro-inflammatory effect of  
514 estrogen. Further understanding of the epigenetic properties of mammary neutrophils during  
515 involution will yield biomarkers that are predictive pro-tumoral neutrophils.

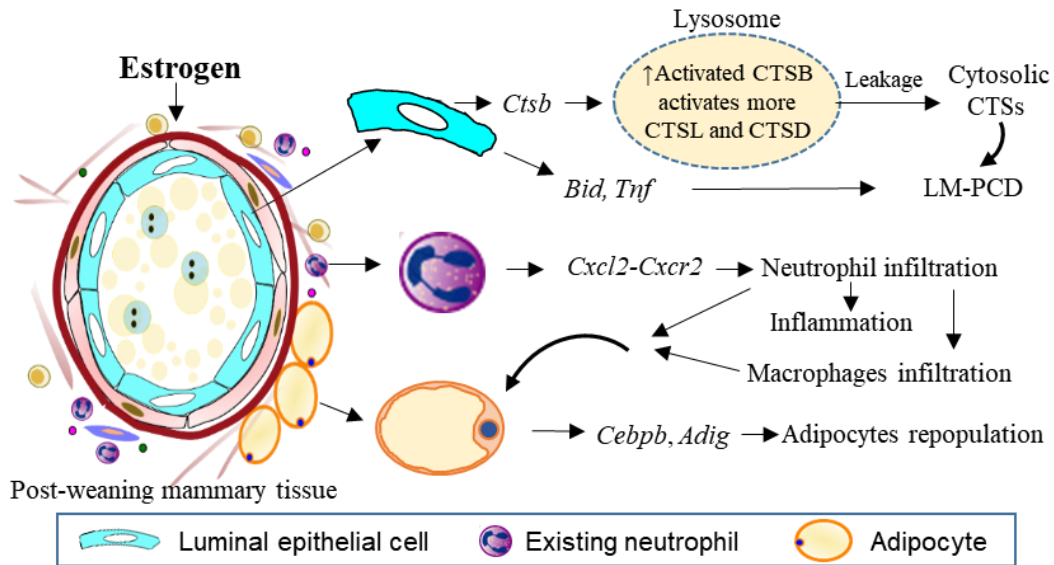

516

517

**Figure 8. Estrogen exacerbates mammary cell death, inflammation and adipocytes repopulation through distinct mechanisms.** Estrogen induces *Ctsb* gene expression in the mammary cells leading to increased pro-CTSB which is cleaved and activated in lysosomes. The increased active sc-CTSB further activates CTSD and CTSL. Increased CTSSB activity enhanced lysosomal permeabilization during mammary involution resulting in the leakage of more activated CTS into the cytosol stimulating a heightened LM-PCD. Estrogen treatment also induces expression of *Bid* and *Tnf* gene which are reported to be involved in the induction of LM-PCD. The apoptotic protein BID is cleaved into the active tBID by the activated cytosolic CTSSs. TNF $\alpha$  is known to induce LM-PCD via the ZnT2-mediated zinc accumulation in lysosomes, leading to PCD. The study also finds that estrogen stimulates neutrophil infiltration into the involuting mammary gland via the CXCL2/CXCR2 pathway. Meanwhile, estrogen promotes the expression of numerous proinflammatory genes such as *Trem1*, *Trem3*, *Il1b*, *S100a8*, *S100a9* in neutrophils that heighten mammary inflammation. Furthermore, increased neutrophil infiltration can also recruit macrophage into the involuting gland contributing to the observed estrogen induced adipocyte repopulation. Estrogen-induced expression of genes coding for extracellular matrix remodelling enzymes such as *Mmp19*, *Mmp3*, *Mmp8*, *Ptx3*, *Col8a2*, *Has2* further facilitate the adipocyte repopulation during mammary involution.

## 518 **Materials and methods**

### 519 **Animal studies**

520 All animal experiments were performed in accordance with the protocol approved by  
521 the Nanyang Technological University Institutional Animal Care and Use Committee (NTU-  
522 IACUC) (IACUC protocol number: A0306 and A18036). BALB/cAnNTac mice used in the  
523 study were housed in specific pathogen-free (SPF) facility under a 12 hours dark/light cycle  
524 and provided food and water ad libitum. Female mice at 7 to 8 weeks old were mated and  
525 subsequently housed individually prior to giving birth. Bilateral ovariectomy (OVX) was  
526 performed on the lactating mice two days post-partum to remove the endogenous source of  
527 estrogen. The litter sizes were standardized to 5-6 pups per lactating mouse. Mammary  
528 involution was initiated by forced weaning on lactating day 12. Nulliparous mice were handled  
529 similarly to the pregnant mice. All mice were randomly distributed into the different treatment  
530 groups.

### 531 **Drug and estrogen treatment**

532  $17\beta$ -estradiol-3-benzoate (E2B) (Sigma-Aldrich) dissolved in benzyl alcohol was  
533 administered subcutaneously at  $20\mu\text{g}/\text{kg}$  of body weight per day in sesame oil. Control (Ctrl)  
534 animals received sesame oil at the corresponding volume per body weight.

535 CXCR2 inhibitor SB225002 (Sigma-Aldrich) was dissolved in DMSO to a stock  
536 concentration of  $20\text{mg}/\text{ml}$ . Mice were treated twice daily at a dosage of  $0.3\text{mg}/\text{kg}$  body weight  
537 via intraperitoneal injection. Stock concentration of SB225002 was diluted to a working  
538 concentration of  $0.2\text{mg}/\text{ml}$  with 0.25% (v/v) Tween 20 (Bio-Rad) in 1xPhosphate-buffered  
539 saline (PBS) (Vivantis). Control mice were treated with DMSO in 0.25% Tween 20 in 1xPBS.



540 Putative S100A9 inhibitor Paquinimod (PAQ) or ABR-215757 was synthesized (Suppl.  
541 Fig. 9) by following the reported protocol [28]. The stock solution was prepared by dissolving  
542 PAQ in DMSO to a concentration of 50mg/ml. Mice were treated with a daily dosage of  
543 20mg/kg body weight via intraperitoneal injection of PAQ diluted with 1xPBS to a working  
544 concentration of 5mg/ml. Control mice were treated with DMSO in 1xPBS.

#### 545 **Neutrophil depletion**

546 At 24h post-weaning, involution day 1 (INV D1), mice were administered with either  
547 rat IgG2a isotype control (clone 2A3, BioXCell) or rat monoclonal anti-mouse Ly6G antibody  
548 (clone 1A8, BioXCell) via intraperitoneal injection. Antibodies were administered at a daily  
549 dosage of 20µg in 100µl of 1xPBS. For nulliparous animals, antibody treatment was performed  
550 at 24h prior to hormone injection. The efficiency of neutrophil depletion by the neutralizing  
551 antibodies was determined by flow cytometry analysis of the blood and the mammary gland.

#### 552 **RNA-sequencing (RNA-Seq)**

553 OVX female mice were treated with either anti-Ly6G or IgG antibody at INV D1. At  
554 INV D2, mice were then treated with either Ctrl or E2B for 24h. Mammary tissues were  
555 collected and snap-frozen in liquid nitrogen and stored at -80°C. Total RNA was extracted from  
556 the powdered 9<sup>th</sup> abdominal mammary gland using TRIzol reagent (Life technologies)  
557 followed by treatment with DNase I (DNA-free™ DNA Removal Kit, Invitrogen) to remove  
558 contaminating DNA according to the manufacturers' protocol. The total RNA was then sent  
559 for library preparation and paired-end sequencing by A\*STAR GIS (Agency for Science,  
560 Technology and Research, Genome Institute of Singapore) using Illumina HiSeq4000. The  
561 Illumina adapter sequence was removed using Trimmalore. Processed sequences were  
562 subsequently mapped to the *Mus musculus* BALB/cJ reference genome (obtained from

563 Ensembl) and counted using the stringtie and featurecount program. Gene annotation files were  
564 also obtained from Ensembl.

565 Processed RNA-Seq data were analysed for differential gene expression using the  
566 DESeq2 package with contrast method [21]. Statistically significant differential gene  
567 expression was determined by Benjamini-Hochberg adjusted p-value (padj). Volcano plot  
568 based on the results of DESeq2 analysis was generated using the plotly package [76]. Venn  
569 diagram was plotted using the online software Venny [77]. Pathway analysis of the  
570 differentially expressed (DE) gene (padj<0.05) was then conducted using the clusterProfiler  
571 package [78] where gene ontology (GO) over-representation analysis was performed. The  
572 enriched GO terms obtained from the GO over-representation analysis were removed of  
573 redundancy using the 'simplify' function which removes highly similar enriched GO terms and  
574 keeps only one representative term. The DESeq2, plotly, and clusterProfiler package was run  
575 in R using RStudio [79, 80].

#### 576 **Isolation of mammary neutrophils**

577 Mammary tissues collected from the euthanized mice were minced into small pieces of  
578 approximately 1mm. Minced mammary tissues were then digested in phenol-red free  
579 Dulbecco's Modified Eagle Medium (DMEM) (Nacalai Tesque) containing 2mM L-glutamine  
580 (GE healthcare), 1mg/ml collagenase (Sigma-Aldrich), and 120 Kunitz DNase I (Sigma-  
581 Aldrich) for 1h at 37°C in water bath with agitation. Digestion was inactivated with an equal  
582 volume of medium and cells were sieved through a 100µm sieve and centrifuged at 450g for  
583 5min at 4°C. Red blood cells (RBC) lysis was then performed with 1ml NH<sub>4</sub>Cl buffer (1 volume  
584 of 0.17M Tris-HCL and 9 volume of 0.155M NH<sub>4</sub>Cl). After inactivation of RBC lysis with 10  
585 volume of 1xPBS, cells were pellet and incubated with 120 Kunitz/ml DNase I for 15min at  
586 room temperature. Cells were then centrifuged again and removed of supernatant before

587 resuspension in isolation buffer (calcium and magnesium-free 1xPBS, 0.1% (w/v) bovine  
588 serum albumin (BSA) (Cell Signaling Technology), 2mM EDTA, pH7.4).

589 Isolation of mammary neutrophils using Dynabeads® (Thermo Fisher Scientific) from  
590 the digested mammary cells were carried out following the manufacturer's protocol. Briefly, 5  
591 million cells from the mammary tissue digest were incubated with 1µg of biotin-anti-Ly6G  
592 antibody (clone 1A8, BioLegend) at 4°C for 10min. After washing, cells were then incubated  
593 with 10µl of Dynabeads® for 30min at 4°C with gentle rotation and tilting. Dynabeads®-bound  
594 cells were separated from the non-bound cells using a magnetic stand (Milipore) on ice.  
595 Isolated Dynabeads® bound neutrophils were washed and then added TRIzol, snap-frozen with  
596 liquid nitrogen and stored at -80°C. A small amount of the non-bound cell fraction after  
597 washing was used for flow cytometry analysis of cell depletion efficiency. Remaining non-  
598 bound cells were also collected in TRIzol, snap-freeze and stored at -80°C. A concurrent  
599 separate isolation was also performed with the same above described protocol with no antibody  
600 incubation. This was done to obtain a negative control to ensure the specificity of the  
601 Dynabeads® isolation process.

## 602 **Quantitative PCR (qPCR)**

603 Following the isolation of total RNA with TRIzol, reverse transcription was carried out  
604 using qScript cDNA SuperMix (Quantabio) following the manufacturer's protocol. qPCR was  
605 carried out with KAPA SYBR FAST qPCR Master Mix (KAPA Biosystems) on the  
606 Quantstudio 6 Flex Real-Time PCR System (Applied Biosystems). qPCR for each target gene  
607 was performed in duplicates. For quantitative analysis, the comparative Threshold Cycle ( $C_t$ )  
608 method was used, while normalizing to  $C_t$  value of *36b4* or *Gapdh* in the same sample. Relative  
609 quantification was performed using the  $2^{-\Delta C_t}$  method [81]. The data are expressed as relative  
610 mRNA level in arbitrary values. Primers are listed in Suppl. Table 1.

## 611 **Histological analysis**

612 4% paraformaldehyde-fixed mammary tissue samples (4<sup>th</sup> abdominal mammary gland)  
613 were paraffin-embedded and sectioned at 5µm for haematoxylin and eosin (H&E) staining and  
614 immunohistochemical (IHC) staining. To quantify epithelial cell death, the number of dying  
615 cells shed into the alveolar lumen of the mammary gland was counted. Apoptotic cells were  
616 identified by their morphological characteristics as described previously [37]. IHC staining was  
617 carried out using the VECTASTAIN<sup>®</sup> Elite<sup>®</sup> ABC Kit (Vector laboratories) and perilipin A  
618 (1:100, D418 Cell Signaling) or cleaved caspase 3 (1:100, #9661 Cell Signaling) followed by  
619 the DAB (3,3'-diaminobenzidine) peroxidase (HRP) substrate kit (with Nickel) (Vector  
620 Laboratories). The tissue sections were counterstained with Richard-Allan Scientific<sup>TM</sup>  
621 Signature Series Hematoxylin 2. All histological analysis was performed with images from at  
622 least 5 random fields for each sample.

## 623 **Subcellular fractionation**

624 Subcellular fractionation of mammary glands was carried out based on the published  
625 protocol [36]. Briefly, mammary tissues in liquid nitrogen were powdered and homogenized  
626 in a handheld homogenizer in subcellular fractionation buffer (20mM HEPES-KOH, 250mM  
627 sucrose, 10mM KCl, 1.5mM MgCl<sub>2</sub>, 1mM EDTA, 1mM EGTA, 8mM dithiothreitol, 1mM  
628 Pefabloc, at pH7.5) and centrifuged at 750g for 10min at 4°C to remove cell nuclei and debris.  
629 The supernatant was then spun at 10,000g for 15min at 4°C to pellet organelles. The pellet was  
630 washed and re-suspended in subcellular fractionation buffer as lysosomal fraction. Organelles  
631 were disrupted by three cycles of freezing and thawing. To collect the cytosolic fraction, the  
632 supernatant collected after pelleting organelles was spun at 100,000g for 1h at 4°C to remove  
633 microsomes. Protein concentration was determined by the Bradford protein assay (Bio-rad).

## 634 **Flow cytometry analysis**

635 Blood cells collected via cardiac puncture were lysed of RBC via incubation with  
636 NH<sub>4</sub>Cl buffer for 15min at room temperature with gentle tilting. RBC lysis was inactivated  
637 with equal volume of 1xPBS followed by centrifugation at 450g for 5min at 4°C and  
638 resuspended in 1xPBS. Mammary tissues were digested as previously described until after the  
639 RBC lysis step in which mammary cells were subsequently reconstituted in 1xPBS. Staining  
640 of cells was carried out with a cocktail of primary antibodies from either BioLegend or  
641 eBioscience comprising of APC-Cy7-anti-CD45 (clone 30-F11), FITC-anti-Ly6C (clone  
642 HK1.4), PE-anti-Ly6G (clone 1A8), Biotin-anti-Gr1 (clone RB6-8C5), and BV605-anti-  
643 CD11b (clone M1/70). Secondary antibody staining was performed with Alexa Fluor® 647-  
644 streptavidin antibody (BioLegend). Dead cells were stained with eFluor 450-fixable viability  
645 dye (eBioscience) before fixation with fixative buffer (BioLegend).

## 646 **Protein collection and western blotting**

647 Proteins were isolated from cells or tissues by adding cold lysis buffer containing  
648 50mM HEPES (pH7.5), 150mM NaCl, 100mM NaF, 1mM PMSF, 1% (v/v) Triton X-100, and  
649 a cocktail of proteinase inhibitors (2ug/ml aprotinin, 5ug/ml leupeptin, 1mM Na<sub>3</sub>VO<sub>4</sub>, and  
650 5ug/ml pepstatin A). After lysis, cells were centrifuged at 13800rpm for 15min at 4°C and the  
651 supernatant collected. Protein concentration was determined with the BCA protein assay kit  
652 (Thermo Fisher Scientific) following the manufacturer's protocol. The collected protein lysate  
653 supernatant was added 5x Laemmli sample buffer and stored at -80°C. Protein samples  
654 collected were analysed with western blotting. The protein band of interest was subsequently  
655 quantitated (normalized to the reference protein band) using quantity one software (Bio-rad).  
656 Antibodies used for western blot analysis are listed in Suppl. Table 2.

657 ***In vitro* studies of estrogen-induced cell death**

658 MCF7-caspase3(+) cells were used in order to observe TNF $\alpha$ -induced apoptosis [43].  
659 Cells were maintained in DMEM containing 2mM L-glutamine and 7.5% fetal calf serum (FCS)  
660 (HyClone) and kept at 37°C in a humidified 5% carbon dioxide and 95% air atmosphere.

661 For estrogen treatment, phenol-red free DMEM supplemented with 2mM L-glutamine  
662 and 5% DCC-FCS (fetal calf serum treated with dextran-coated charcoal) was used. Treatment  
663 of FCS with dextran-coated charcoal was performed to remove steroid hormones present in the  
664 FCS. MCF7-caspase3(+) cells were plated at 150k in 6-well plate (Corning) with the DCC-  
665 FCS supplemented medium. After 48h, the medium was replaced, and cells were treated with  
666 either TNF $\alpha$  (ProSpec) diluted in 1xPBS or vehicle control. One hour after TNF $\alpha$  treatment,  
667 cells were then treated with 10nM 17 $\beta$ -estradiol (E2) diluted in 100% ethanol or vehicle control.  
668 MCF7-caspase3(+) cells were harvested for analysis 24h after E2 treatment. Both floating dead  
669 cells and the adherent live cells were collected. Harvested cells were resuspended in 1xPBS  
670 and stained with 0.1 $\mu$ g PI per 100ul of 1xPBS for 15min at room temperature. After staining,  
671 400 $\mu$ l of 1xPBS were added and cells were immediately analysed with the flow cytometer.

672 **Statistical analysis**

673 Graphs were plotted using the mean value with the standard error of the mean (SEM).  
674 When comparing 2 groups, statistical significance was determined using a two-tailed unpaired  
675 student's t-test. When comparing between more than 2 groups, one-way ANOVA followed by  
676 post-hoc turkey test was performed. All statistical analysis was performed using the GraphPad  
677 Prism 7 software. p-value: <0.05 (\*), <0.01 (\*\*), <0.001 (\*\*\*), <0.0001 (\*\*\*\*).

678 **Acknowledgements**

679 This research is funded the Ministry of Education of Singapore. Academic Research Fund Tier  
680 I, MOE2017-T1-002-08. We thank Drs. Natasa Bajalovic, Amanda Woo and Mr. Lee Shi Hao  
681 for their technical assistance.

682 **Competing interest**

683 The authors declare that they have no competing interests.

## References

1. Lyons TR, Borges VF, Betts CB, Guo Q, Kapoor P, Martinson HA, Jindal S, Schedin P: **Cyclooxygenase-2-dependent lymphangiogenesis promotes nodal metastasis of postpartum breast cancer.** *The Journal of clinical investigation* 2014, **124**(9):3901-3912.
2. Lyons TR, O'Brien J, Borges VF, Conklin MW, Keely PJ, Eliceiri KW, Marusyk A, Tan A-C, Schedin P: **Postpartum mammary gland involution drives progression of ductal carcinoma in situ through collagen and COX-2.** *Nat Med* 2011, **17**(9):1109-1115.
3. Foster DS, Jones RE, Ransom RC, Longaker MT, Norton JA: **The evolving relationship of wound healing and tumor stroma.** *JCI Insight* 2018, **3**(18).
4. Chung HH, Or YZ, Shrestha S, Loh JT, Lim CL, Ong Z, Woo ARE, Su IH, Lin VCL: **Estrogen reprograms the activity of neutrophils to foster protumoral microenvironment during mammary involution.** *Sci Rep* 2017, **7**:46485.
5. Li M, Liu X, Robinson G, Bar-Peled U, Wagner K-U, Young WS, Hennighausen L, Furth PA: **Mammary-derived signals activate programmed cell death during the first stage of mammary gland involution.** *Proceedings of the National Academy of Sciences* 1997, **94**(7):3425-3430.
6. Jaggi R, Marti A, Guo K, Feng Z, Friis RR: **Regulation of a physiological apoptosis: mouse mammary involution.** *J Dairy Sci* 1996, **79**(6):1074-1084.
7. Strange R, Li F, Saurer S, Burkhardt A, Friis RR: **Apoptotic cell death and tissue remodelling during mouse mammary gland involution.** *Development* 1992, **115**(1):49-58.
8. Walker NI, Bennett RE, Kerr JFR: **Cell death by apoptosis during involution of the lactating breast in mice and rats.** *American Journal of Anatomy* 1989, **185**(1):19-32.
9. Stein T, Morris JS, Davies CR, Weber-Hall SJ, Duffy MA, Heath VJ, Bell AK, Ferrier RK, Sandilands GP, Gusterson BA: **Involution of the mouse mammary gland is associated with an immune cascade and an acute-phase response, involving LBP, CD14 and STAT3.** *Breast Cancer Res* 2004, **6**(2):R75-91.



10. Clarkson RW, Watson CJ: **Microarray analysis of the involution switch**. *J Mammary Gland Biol Neoplasia* 2003, **8**(3):309-319.
11. Wang J: **Neutrophils in tissue injury and repair**. *Cell Tissue Res* 2018, **371**(3):531-539.
12. Fridlender ZG, Sun J, Kim S, Kapoor V, Cheng G, Ling L, Worthen GS, Albelda SM: **Polarization of tumor-associated neutrophil phenotype by TGF-beta: "N1" versus "N2" TAN**. *Cancer Cell* 2009, **16**(3):183-194.
13. Shaul ME, Fridlender ZG: **Tumour-associated neutrophils in patients with cancer**. *Nat Rev Clin Oncol* 2019, **16**(10):601-620.
14. Sagiv JY, Michaeli J, Assi S, Mishalian I, Kisos H, Levy L, Damti P, Lumbroso D, Polyansky L, Sionov RV *et al*: **Phenotypic diversity and plasticity in circulating neutrophil subpopulations in cancer**. *Cell Rep* 2015, **10**(4):562-573.
15. Mishalian I, Granot Z, Fridlender ZG: **The diversity of circulating neutrophils in cancer**. *Immunobiology* 2017, **222**(1):82-88.
16. Satoh K: **Retardation of mammary involution in mice by estrogen and progesterone**. *Nihon Chikusan Gakkaiho* 1970, **41**(7):372-374.
17. Ambili M, Jayasree K, Sudhakaran PR: **60K gelatinase involved in mammary gland involution is regulated by beta-oestradiol**. *Biochim Biophys Acta* 1998, **1403**(3):219-231.
18. Athie F, Bachman KC, Head HH, Hayen MJ, Wilcox CJ: **Milk Plasmin During Bovine Mammary Involution That Has Been Accelerated by Estrogen**. *Journal of dairy science* 1997, **80**(8):1561-1568.
19. Athie F, Bachman KC, Head HH, Hayen MJ, Wilcox CJ: **Estrogen administered at final milk removal accelerates involution of bovine mammary gland**. *J Dairy Sci* 1996, **79**(2):220-226.
20. Greenberg AS, Egan JJ, Wek SA, Garty NB, Blanchette-Mackie EJ, Londos C: **Perilipin, a major hormonally regulated adipocyte-specific phosphoprotein associated with the periphery of lipid storage droplets**. *J Biol Chem* 1991, **266**(17):11341-11346.

21. Love MI, Huber W, Anders S: **Moderated estimation of fold change and dispersion for RNA-seq data with DESeq2.** *Genome Biol* 2014, **15**(12):550.
22. Du M, Yuan L, Tan X, Huang D, Wang X, Zheng Z, Mao X, Li X, Yang L, Huang K *et al*: **The LPS-inducible lncRNA Mirt2 is a negative regulator of inflammation.** *Nat Commun* 2017, **8**(1):2049.
23. Wang S, Song R, Wang Z, Jing Z, Wang S, Ma J: **S100A8/A9 in inflammation.** *Front Immunol* 2018, **9**:1298.
24. Girbl T, Lenn T, Perez L, Rolas L, Barkaway A, Thirirot A, Del Fresno C, Lynam E, Hub E, Thelen M *et al*: **Distinct compartmentalization of the chemokines CXCL1 and CXCL2 and the atypical receptor ACKR1 determine discrete stages of neutrophil diapedesis.** *Immunity* 2018, **49**(6):1062-1076 e1066.
25. De Filippo K, Dudeck A, Hasenberg M, Nye E, van Rooijen N, Hartmann K, Gunzer M, Roers A, Hogg N: **Mast cell and macrophage chemokines CXCL1/CXCL2 control the early stage of neutrophil recruitment during tissue inflammation.** *Blood* 2013, **121**(24):4930-4937.
26. Bengtsson AA, Sturfelt G, Lood C, Ronnblom L, van Vollenhoven RF, Axelsson B, Sparre B, Tuveesson H, Ohman MW, Leanderson T: **Pharmacokinetics, tolerability, and preliminary efficacy of paquinimod (ABR-215757), a new quinoline-3-carboxamide derivative: studies in lupus-prone mice and a multicenter, randomized, double-blind, placebo-controlled, repeat-dose, dose-ranging study in patients with systemic lupus erythematosus.** *Arthritis Rheum* 2012, **64**(5):1579-1588.
27. Bjork P, Bjork A, Vogl T, Stenstrom M, Liberg D, Olsson A, Roth J, Ivars F, Leanderson T: **Identification of human S100A9 as a novel target for treatment of autoimmune disease via binding to quinoline-3-carboxamides.** *PLoS Biol* 2009, **7**(4):e97.
28. Jonsson S, Andersson G, Fex T, Fristedt T, Hedlund G, Jansson K, Abramo L, Fritzson I, Pekarski O, Runstrom A *et al*: **Synthesis and biological evaluation of new 1,2-dihydro-4-**

- hydroxy-2-oxo-3-quinolinecarboxamides for treatment of autoimmune disorders: structure-activity relationship.** *J Med Chem* 2004, **47**(8):2075-2088.
29. White JR, Lee JM, Young PR, Hertzberg RP, Jurewicz AJ, Chaikin MA, Widdowson K, Foley JJ, Martin LD, Griswold DE *et al*: **Identification of a potent, selective non-peptide CXCR2 antagonist that inhibits interleukin-8-induced neutrophil migration.** *J Biol Chem* 1998, **273**(17):10095-10098.
30. Alexander CM, Selvarajan S, Mudgett J, Werb Z: **Stromelysin-1 regulates adipogenesis during mammary gland involution.** *J Cell Biol* 2001, **152**(4):693-703.
31. Chavey C, Mari B, Monthouel MN, Bonnafous S, Anglard P, Van Obberghen E, Tartare-Deckert S: **Matrix metalloproteinases are differentially expressed in adipose tissue during obesity and modulate adipocyte differentiation.** *J Biol Chem* 2003, **278**(14):11888-11896.
32. Owen CA, Hu Z, Lopez-Otin C, Shapiro SD: **Membrane-bound matrix metalloproteinase-8 on activated polymorphonuclear cells is a potent, tissue inhibitor of metalloproteinase-resistant collagenase and serpinase.** *J Immunol* 2004, **172**(12):7791-7803.
33. Cawthorn WP, Heyd F, Hegyi K, Sethi JK: **Tumour necrosis factor-alpha inhibits adipogenesis via a beta-catenin/TCF4(TCF7L2)-dependent pathway.** *Cell Death Differ* 2007, **14**(7):1361-1373.
34. Kraakman MJ, Kammoun HL, Allen TL, Deswaerte V, Henstridge DC, Estevez E, Matthews VB, Neill B, White DA, Murphy AJ *et al*: **Blocking IL-6 trans-signaling prevents high-fat diet-induced adipose tissue macrophage recruitment but does not improve insulin resistance.** *Cell Metab* 2015, **21**(3):403-416.
35. Sargeant TJ, Lloyd-Lewis B, Resemann HK, Ramos-Montoya A, Skepper J, Watson CJ: **Stat3 controls cell death during mammary gland involution by regulating uptake of milk fat globules and lysosomal membrane permeabilization.** *Nature Cell Biology* 2014, **16**(11):1057-1068.

36. Kreuzaler PA, Staniszewska AD, Li W, Omidvar N, Kedjouar B, Turkson J, Poli V, Flavell RA, Clarkson RW, Watson CJ: **Stat3 controls lysosomal-mediated cell death in vivo**. *Nat Cell Biol* 2011, **13**(3):303-309.
37. Watson CJ, Kreuzaler PA: **Remodeling mechanisms of the mammary gland during involution**. *Int J Dev Biol* 2011, **55**(7-9):757-762.
38. Mach L, Mort JS, Glossl J: **Maturation of human procathepsin B. Proenzyme activation and proteolytic processing of the precursor to the mature proteinase, in vitro, are primarily unimolecular processes**. *The Journal of biological chemistry* 1994, **269**(17):13030-13035.
39. Menard R, Carmona E, Takebe S, Dufour E, Plouffe C, Mason P, Mort JS: **Autocatalytic processing of recombinant human procathepsin L. Contribution of both intermolecular and unimolecular events in the processing of procathepsin L in vitro**. *The Journal of biological chemistry* 1998, **273**(8):4478-4484.
40. Fukazawa T, Walter B, Owen-Schaub LB: **Adenoviral Bid overexpression induces caspase-dependent cleavage of truncated Bid and p53-independent apoptosis in human non-small cell lung cancers**. *J Biol Chem* 2003, **278**(28):25428-25434.
41. Li Y, Dai C, Li J, Wang W, Song G: **Bid-overexpression regulates proliferation and phosphorylation of Akt and MAPKs in response to etoposide-induced DNA damage in hepatocellular carcinoma cells**. *Onco Targets Ther* 2012, **5**:279-286.
42. Janicke RU: **MCF-7 breast carcinoma cells do not express caspase-3**. *Breast Cancer Res Treat* 2009, **117**(1):219-221.
43. Janicke RU, Sprengart ML, Wati MR, Porter AG: **Caspase-3 is required for DNA fragmentation and morphological changes associated with apoptosis**. *J Biol Chem* 1998, **273**(16):9357-9360.
44. Lee HR, Choi KC: **4-tert-Octylphenol stimulates the expression of cathepsins in human breast cancer cells and xenografted breast tumors of a mouse model via an estrogen receptor-mediated signaling pathway**. *Toxicology* 2013, **304**:13-20.

45. Bhardwaj P, Du B, Zhou XK, Sue E, Giri D, Harbus MD, Falcone DJ, Hudis CA, Subbaramaiah K, Dannenberg AJ: **Estrogen Protects against Obesity-Induced Mammary Gland Inflammation in Mice.** *Cancer Prev Res (Phila)* 2015, **8**(8):751-759.
46. Medina-Estrada I, Lopez-Meza JE, Ochoa-Zarzosa A: **Anti-Inflammatory and Antimicrobial Effects of Estradiol in Bovine Mammary Epithelial Cells during Staphylococcus aureus Internalization.** *Mediators Inflamm* 2016, **2016**:16.
47. Frasor J, Weaver A, Pradhan M, Dai Y, Miller LD, Lin CY, Stanculescu A: **Positive cross-talk between estrogen receptor and NF-kappaB in breast cancer.** *Cancer research* 2009, **69**(23):8918-8925.
48. Franco HL, Nagari A, Kraus WL: **TNFalpha signaling exposes latent estrogen receptor binding sites to alter the breast cancer cell transcriptome.** *Molecular cell* 2015, **58**(1):21-34.
49. Molero L, Garcia-Duran M, Diaz-Recasens J, Rico L, Casado S, Lopez-Farre A: **Expression of estrogen receptor subtypes and neuronal nitric oxide synthase in neutrophils from women and men: regulation by estrogen.** *Cardiovasc Res* 2002, **56**(1):43-51.
50. Shindo S, Moore R, Flake G, Negishi M: **Serine 216 phosphorylation of estrogen receptor alpha in neutrophils: migration and infiltration into the mouse uterus.** *PLoS One* 2013, **8**(12):e84462.
51. Svoronos N, Perales-Puchalt A, Allegranza MJ, Rutkowski MR, Payne KK, Tesone AJ, Nguyen JM, Curiel TJ, Cadungog MG, Singhal S *et al*: **Tumor cell-independent estrogen signaling drives disease progression through mobilization of myeloid-derived suppressor cells.** *Cancer Discov* 2017, **7**(1):72-85.
52. Sue RD, Belperio JA, Burdick MD, Murray LA, Xue YY, Dy MC, Kwon JJ, Keane MP, Strieter RM: **CXCR2 is critical to hyperoxia-induced lung injury.** *J Immunol* 2004, **172**(6):3860-3868.
53. Cugini D, Azzollini N, Gagliardini E, Cassis P, Bertini R, Colotta F, Noris M, Remuzzi G, Benigni A: **Inhibition of the chemokine receptor CXCR2 prevents kidney graft function deterioration due to ischemia/reperfusion.** *Kidney Int* 2005, **67**(5):1753-1761.

54. Belperio JA, Keane MP, Burdick MD, Gomperts BN, Xue YY, Hong K, Mestas J, Zisman D, Ardehali A, Saggar R *et al*: **CXCR2/CXCR2 ligand biology during lung transplant ischemia-reperfusion injury**. *J Immunol* 2005, **175**(10):6931-6939.
55. Bertini R, Allegretti M, Bizzarri C, Moriconi A, Locati M, Zampella G, Cervellera MN, Di Cioccio V, Cesta MC, Galliera E *et al*: **Noncompetitive allosteric inhibitors of the inflammatory chemokine receptors CXCR1 and CXCR2: prevention of reperfusion injury**. *Proc Natl Acad Sci U S A* 2004, **101**(32):11791-11796.
56. Cao Q, Li B, Wang X, Sun K, Guo Y: **Therapeutic inhibition of CXC chemokine receptor 2 by SB225002 attenuates LPS-induced acute lung injury in mice**. *Arch Med Sci* 2018, **14**(3):635-644.
57. Bouchon A, Dietrich J, Colonna M: **Cutting edge: inflammatory responses can be triggered by TREM-1, a novel receptor expressed on neutrophils and monocytes**. *J Immunol* 2000, **164**(10):4991-4995.
58. Klesney-Tait J, Keck K, Li X, Gilfillan S, Otero K, Baruah S, Meyerholz DK, Varga SM, Knudson CJ, Moninger TO *et al*: **Transepithelial migration of neutrophils into the lung requires TREM-1**. *J Clin Invest* 2013, **123**(1):138-149.
59. Chen JQ, Brown TR, Russo J: **Regulation of energy metabolism pathways by estrogens and estrogenic chemicals and potential implications in obesity associated with increased exposure to endocrine disruptors**. *Biochim Biophys Acta* 2009, **1793**(7):1128-1143.
60. Lapid K, Lim A, Clegg DJ, Zeve D, Graff JM: **Oestrogen signalling in white adipose progenitor cells inhibits differentiation into brown adipose and smooth muscle cells**. *Nat Commun* 2014, **5**:5196.
61. Hong YH, Hishikawa D, Miyahara H, Tsuzuki H, Nishimura Y, Gotoh C, Choi KC, Hokari Y, Takagi Y, Lee HG *et al*: **Up-regulation of adipogenin, an adipocyte plasma transmembrane protein, during adipogenesis**. *Mol Cell Biochem* 2005, **276**(1-2):133-141.

62. Kim JY, Tillison K, Smas CM: **Cloning, expression, and differentiation-dependent regulation of SMAF1 in adipogenesis.** *Biochem Biophys Res Commun* 2005, **326**(1):36-44.
63. Boyle KB, Hadaschik D, Virtue S, Cawthorn WP, Ridley SH, O'Rahilly S, Siddle K: **The transcription factors Egr1 and Egr2 have opposing influences on adipocyte differentiation.** *Cell Death Differ* 2009, **16**(5):782-789.
64. Chen Z, Torrens JI, Anand A, Spiegelman BM, Friedman JM: **Krox20 stimulates adipogenesis via C/EBPbeta-dependent and -independent mechanisms.** *Cell Metab* 2005, **1**(2):93-106.
65. Guo L, Li X, Tang QQ: **Transcriptional regulation of adipocyte differentiation: a central role for CCAAT/enhancer-binding protein (C/EBP) beta.** *J Biol Chem* 2015, **290**(2):755-761.
66. O'Brien J, Martinson H, Durand-Rougely C, Schedin P: **Macrophages are crucial for epithelial cell death and adipocyte repopulation during mammary gland involution.** *Development* 2012, **139**(2):269-275.
67. Werneburg NW, Guicciardi ME, Bronk SF, Gores GJ: **Tumor necrosis factor-alpha-associated lysosomal permeabilization is cathepsin B dependent.** *American journal of physiology Gastrointestinal and liver physiology* 2002, **283**(4):G947-956.
68. Hennigar SR, Kelleher SL: **TNFalpha Post-Translationally Targets ZnT2 to Accumulate Zinc in Lysosomes.** *J Cell Physiol* 2015, **230**(10):2345-2350.
69. Hennigar SR, Seo YA, Sharma S, Soybel DI, Kelleher SL: **ZnT2 is a critical mediator of lysosomal-mediated cell death during early mammary gland involution.** *Sci Rep* 2015, **5**:8033.
70. Droga-Mazovec G, Bojic L, Petelin A, Ivanova S, Romih R, Repnik U, Salvesen GS, Stoka V, Turk V, Turk B: **Cysteine cathepsins trigger caspase-dependent cell death through cleavage of bid and antiapoptotic Bcl-2 homologues.** *J Biol Chem* 2008, **283**(27):19140-19150.
71. Stoka V, Turk B, Schendel SL, Kim TH, Cirman T, Snipas SJ, Ellerby LM, Bredesen D, Freeze H, Abrahamson M *et al*: **Lysosomal protease pathways to apoptosis. Cleavage of bid, not procaspases, is the most likely route.** *J Biol Chem* 2001, **276**(5):3149-3157.

72. Ariazi EA, Cunliffe HE, Lewis-Wambi JS, Slifker MJ, Willis AL, Ramos P, Tapia C, Kim HR, Yerrum S, Sharma CG *et al*: **Estrogen induces apoptosis in estrogen deprivation-resistant breast cancer through stress responses as identified by global gene expression across time.** *Proc Natl Acad Sci U S A* 2011, **108**(47):18879-18886.
73. Perez-Garijo A, Steller H: **Spreading the word: non-autonomous effects of apoptosis during development, regeneration and disease.** *Development* 2015, **142**(19):3253-3262.
74. Fan Y, Wang S, Hernandez J, Yenigun VB, Hertlein G, Fogarty CE, Lindblad JL, Bergmann A: **Genetic models of apoptosis-induced proliferation decipher activation of JNK and identify a requirement of EGFR signaling for tissue regenerative responses in Drosophila.** *PLoS Genet* 2014, **10**(1):e1004131.
75. Nicolas-Avila JA, Adrover JM, Hidalgo A: **Neutrophils in Homeostasis, Immunity, and Cancer.** *Immunity* 2017, **46**(1):15-28.
76. Sievert C: **plotly for R.** In.; 2018.
77. **Venny. An interactive tool for comparing lists with Venn's diagrams.**  
[\[http://bioinfogp.cnb.csic.es/tools/venny/index.html\]](http://bioinfogp.cnb.csic.es/tools/venny/index.html)
78. Yu G, Wang LG, Han Y, He QY: **clusterProfiler: an R package for comparing biological themes among gene clusters.** *OMICS* 2012, **16**(5):284-287.
79. RStudio Team: **RStudio: integrated development environment for R.** In., 1.2.1335 edn: RStudio, Inc.; 2018.
80. R Core Team: **R: A language and environment for statistical computing.** In.: R Foundation for Statistical Computing; 2019.
81. Schmittgen TD, Livak KJ: **Analyzing real-time PCR data by the comparative C(T) method.** *Nat Protoc* 2008, **3**(6):1101-1108.



## Supplementary figures

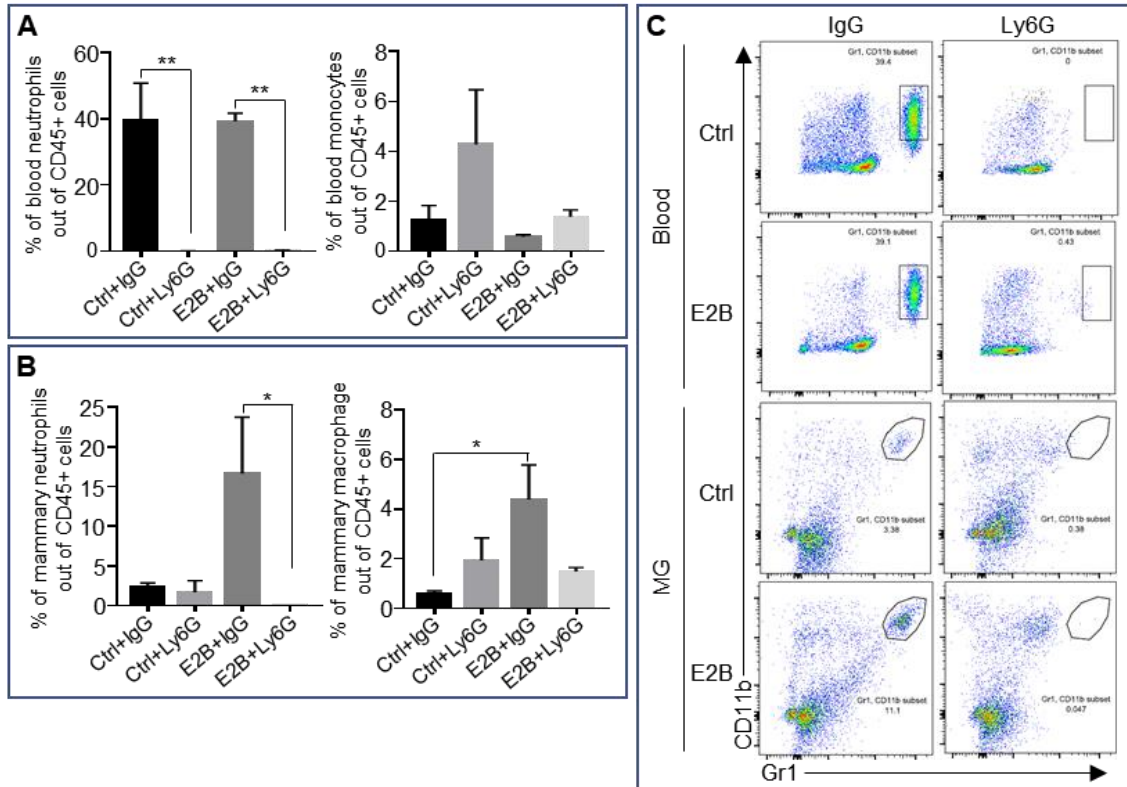

**Supplementary Figure 1. Depletion efficiency of neutrophils with anti-neutrophil antibody Ly6G.** Mice at INV D1 was treated with anti-Ly6G antibody (Ly6G) or isotype control (IgG). 24h later, they were treated with vehicle control (Ctrl) or E2B for 24h. Flow cytometry analysis were performed on total blood cells and from digested mammary gland (MG) tissue after red blood cells lysis. A, Ly6G treatment significantly reduces circulating blood neutrophils by more than 90% while not affecting blood monocytes; Percentage of blood neutrophils (CD45+ CD11b+ Gr1<sup>hi</sup>) and monocytes (CD45+ CD11b+ Ly6C<sup>hi</sup>) out of live CD45+ population. B, E2B treatment in mice given IgG increased the percentage of mammary neutrophils by 6 folds and this effect was abolished by neutrophil depletion with Ly6G. Mammary macrophages was also increased significantly by E2B treatment and was attenuated with Ly6G but to a non-statistically significant level; Percentage of mammary neutrophils (CD45+ CD11b+ Gr1<sup>hi</sup>) and macrophages (CD45+ CD11b+ Ly6C<sup>hi</sup>) out of live CD45+ population. Ctrl+IgG n=3, Ctrl+Ly6G n=3, E2B+IgG n=3, E2B+Ly6G n=3. C, Representative flow cytometry dot plot for the neutrophils in the blood and MG. Data represented as mean ± SEM.

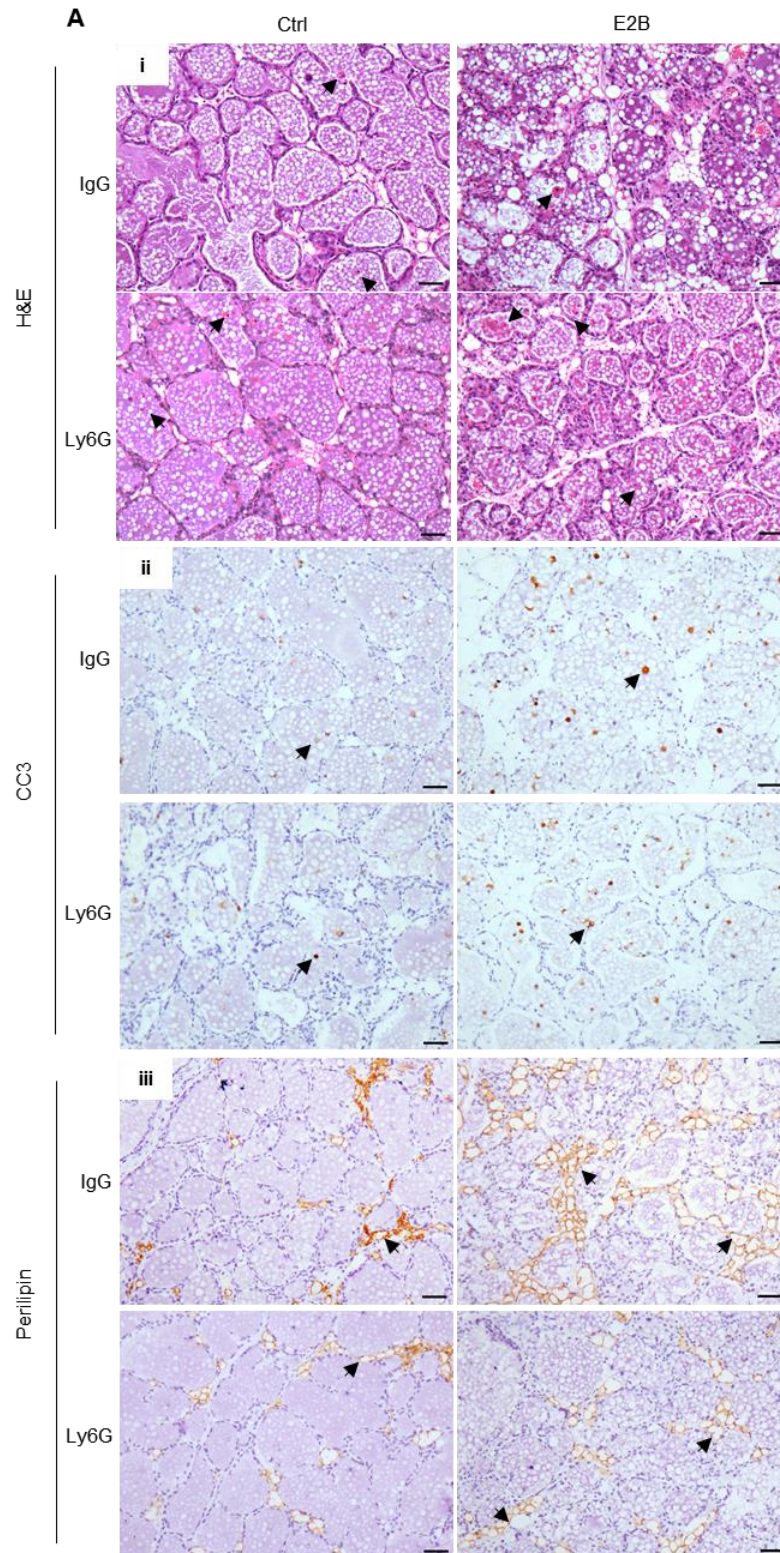

**Supplementary Figure 2. Effect of neutrophil depletion on estrogen-induced cell death and adipocytes repopulation.** Mice at INV D1 were administered with isotype control (IgG) or anti-neutrophil antibody (Ly6G) and treated with Ctrl or E2B for 48h. A, Neutrophil depletion attenuates E2B-induced adipocyte repopulation but did not affect the E2B-stimulated cell death in involuting mammary gland; (i) H&E stained mammary tissue sections; shed cells with hyper-condensed nuclei are indicated by arrows. (ii) IHC of cleaved caspase-3 (CC3); arrows indicate CC3<sup>+</sup> cells. (iii) Perilipin IHC; arrows indicate perilipin<sup>+</sup> adipocytes. Scale bars: 50 $\mu$ m.

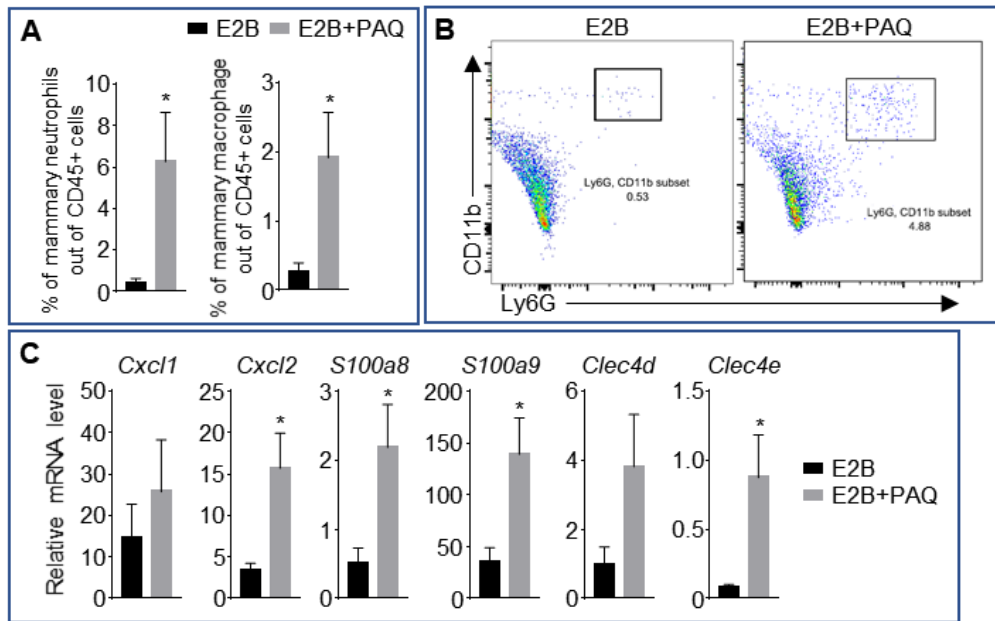

**Supplementary Figure 3. Putative S100A9 inhibitor Paquinimod promotes neutrophil infiltration.** Mice were treated at INV D1 with either E2B or E2B+PAQ for 48h. A, Treatment with E2B and PAQ significantly induces neutrophil and macrophage infiltration into the involuting MG as compared to E2B-treated; Flow cytometry analysis of mammary neutrophils (CD45+ CD11b+ Ly6G+) and macrophages (CD45+ CD11b+ Ly6G<sup>hi</sup>) out of live CD45+ cell population. B, Representative flow cytometry dot plot for the percentage of neutrophils in the MG. C, Treatment with E2B and PAQ increases the expression of some inflammatory genes as compared to E2B-treated; Gene expression of inflammatory genes *Cxcl1*, *Cxcl2*, *S100a8*, *S100a9*, *Clec4d*, and *Clec4e* relative to *36b4* by qPCR analysis. E2B n=6, E2B+PAQ n=5. Data represented as mean ± SEM.

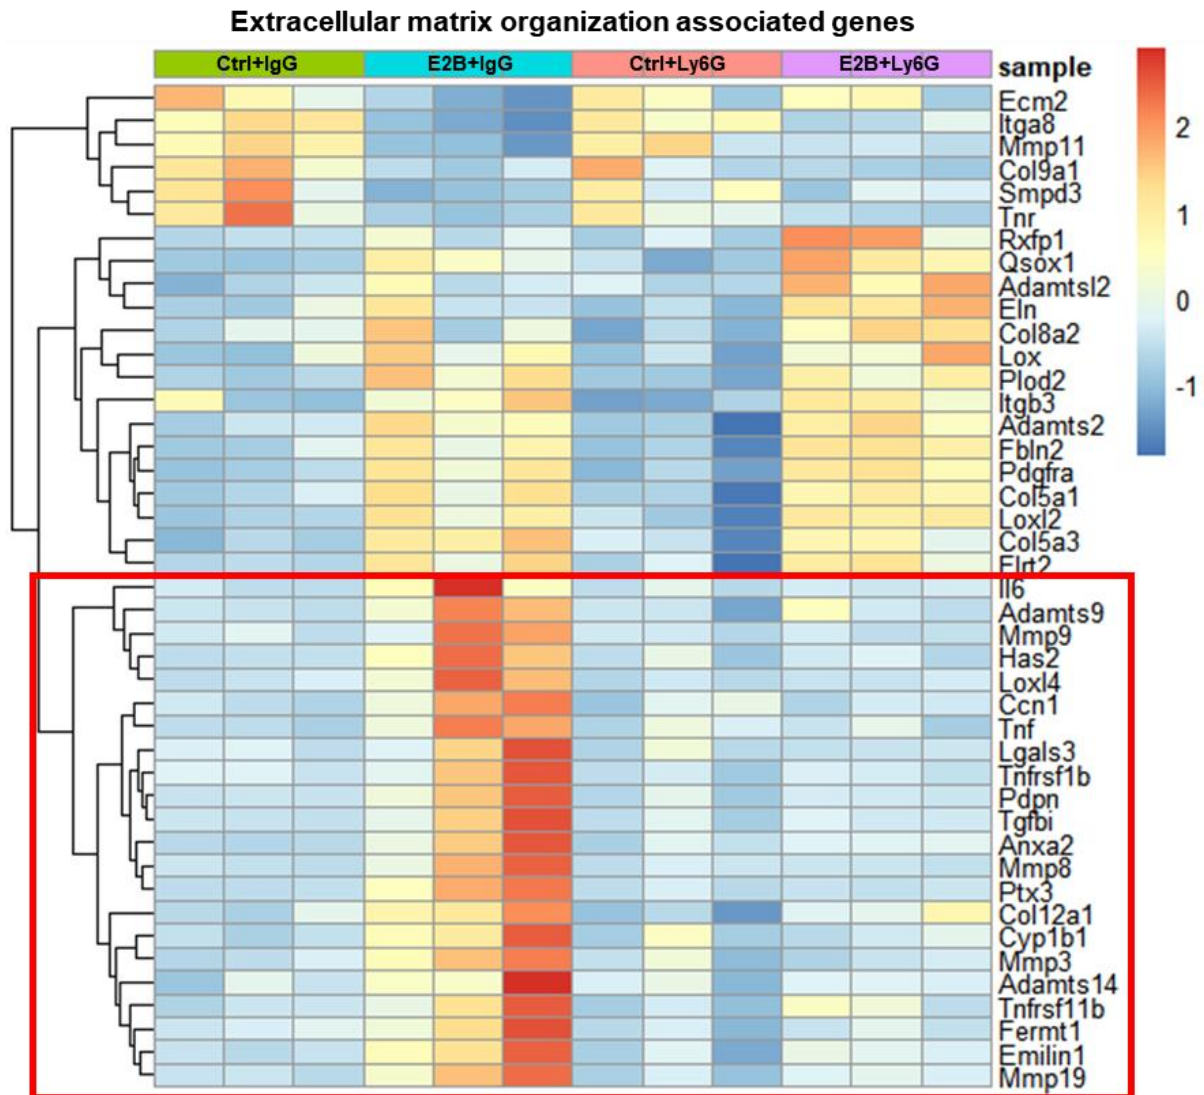

**Supplementary Figure 4. 50% of estrogen-regulated ECM genes are abolished by neutrophil depletion.** Mice at INV D1 was treated with anti-Ly6G antibody (Ly6G) or isotype control (IgG). 24h later, they were treated with vehicle control (Ctrl) or E2B for 24h. Heatmap representation of genes associated to extracellular matrix organization identified from the GO over-representation analysis ( $\geq 2$  and  $\leq -2$ -fold) of the DESeq2 analysed RNA-Seq data; Highlighted red box indicates part of the heatmap replotted and presented in Fig. 4C; CTRL+IgG n=3, CTRL+Ly6G n=3, E2B+IgG n=3, E2B+Ly6G n=3.

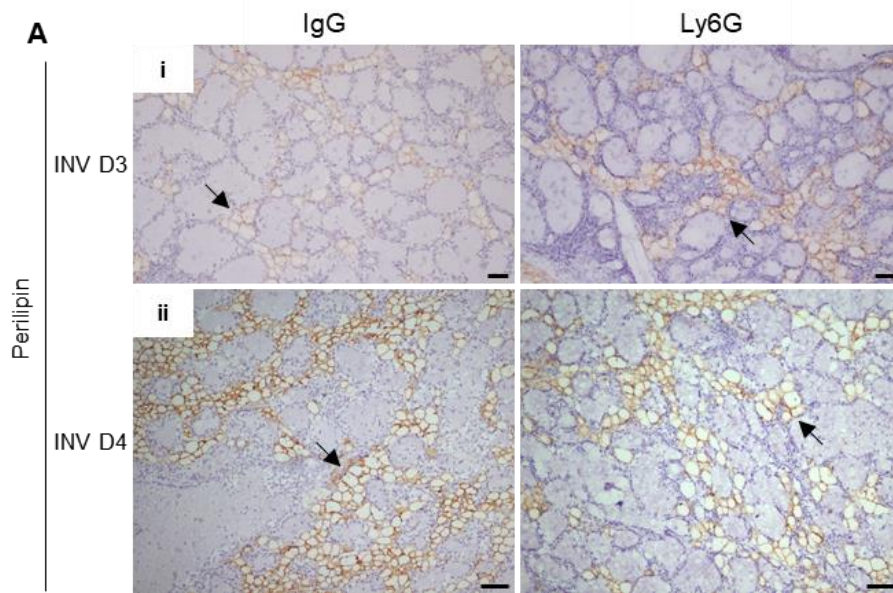

**Supplementary Figure 5. Neutrophil depletion transiently reduces E2B-induced adipocyte repopulation during mammary involution.** Non-OVX mice were treated daily with either anti-Ly6G antibody (Ly6G) or isotype control (IgG) at 24h post-weaning (INV D1). Mammary tissue was collected for analysis at INV D3 and INV D4. A, (i) Perilipin IHC at INV D3; (ii) Perilipin IHC at INV D4; arrows indicate perilipin<sup>+</sup> adipocytes. Scale bars: 50 $\mu$ m.

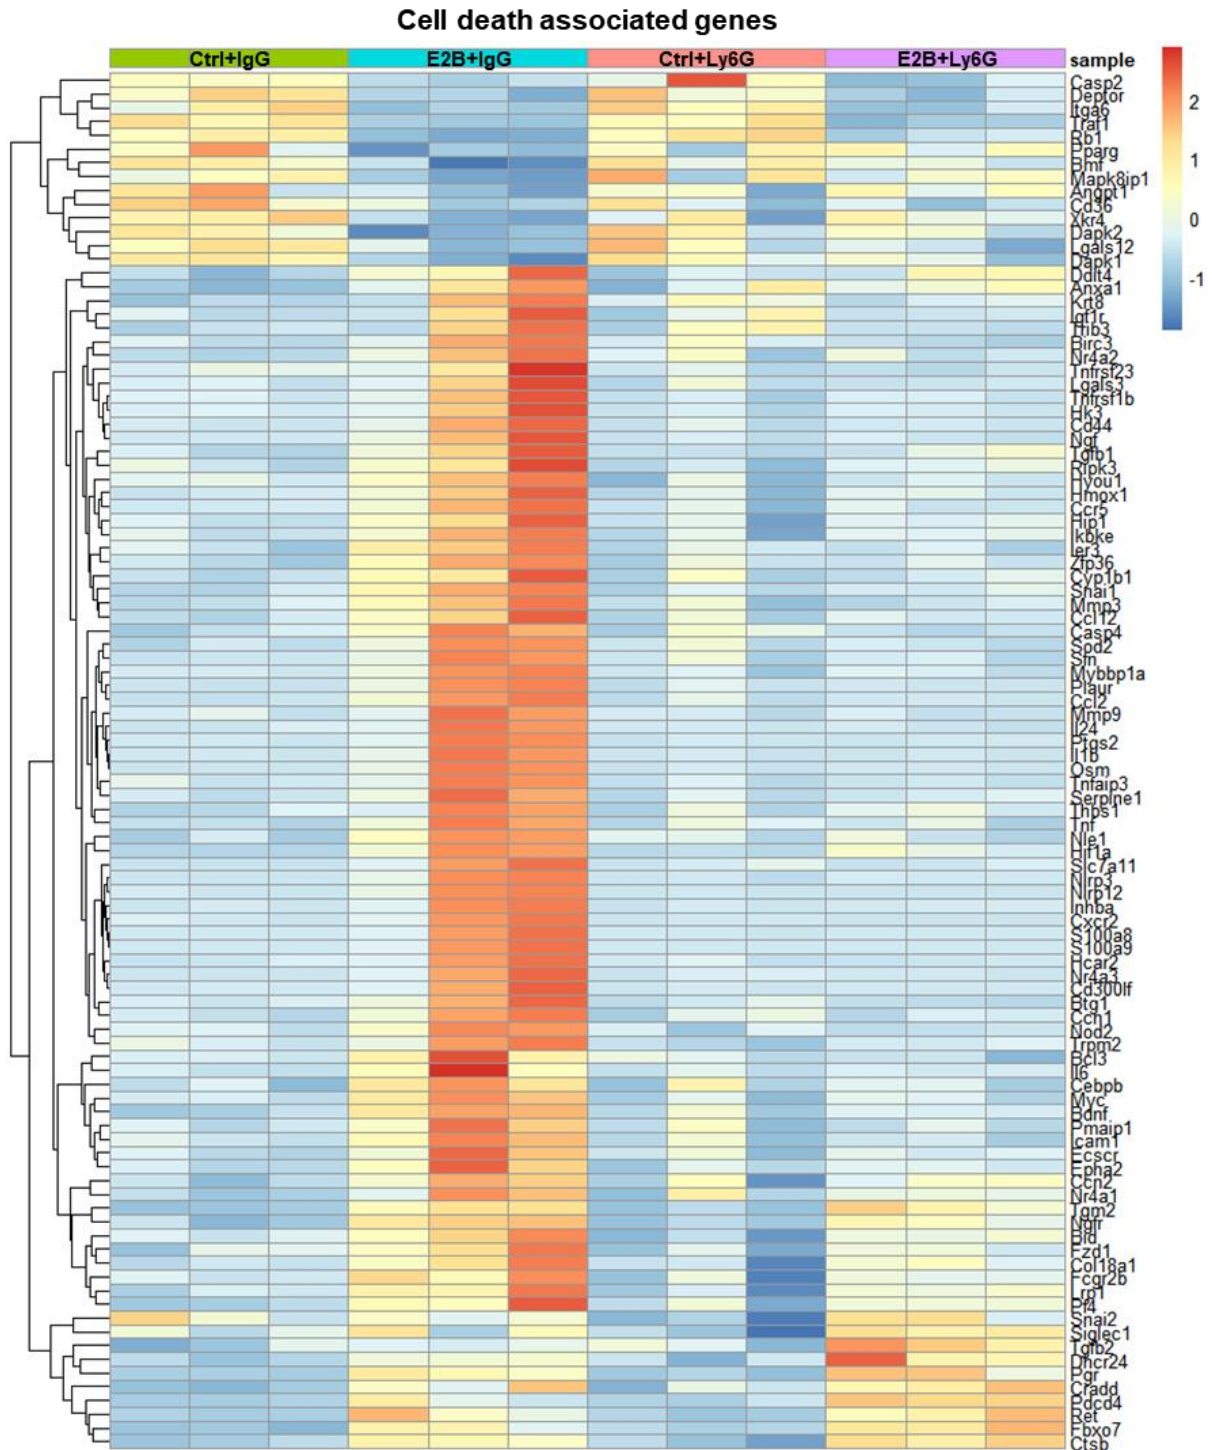

**Supplementary Figure 6. Heatmap representation of estrogen-regulated genes associated with cell death from the GO over-representation analysis.** Mice at INV D1 was treated with anti-Ly6G antibody (Ly6G) or isotype control (IgG). 24h later, they were treated with vehicle control (Ctrl) or E2B for 24h. The genes plotted exhibit fold change of  $\geq 1.5$  and  $\leq -1.5$  with  $\text{padj} < 0.05$  from the DESeq2 analysis of the RNA-Seq data. Ctrl+IgG n=3, Ctrl+Ly6G n=3, E2B+IgG n=3, E2B+Ly6G n=3.

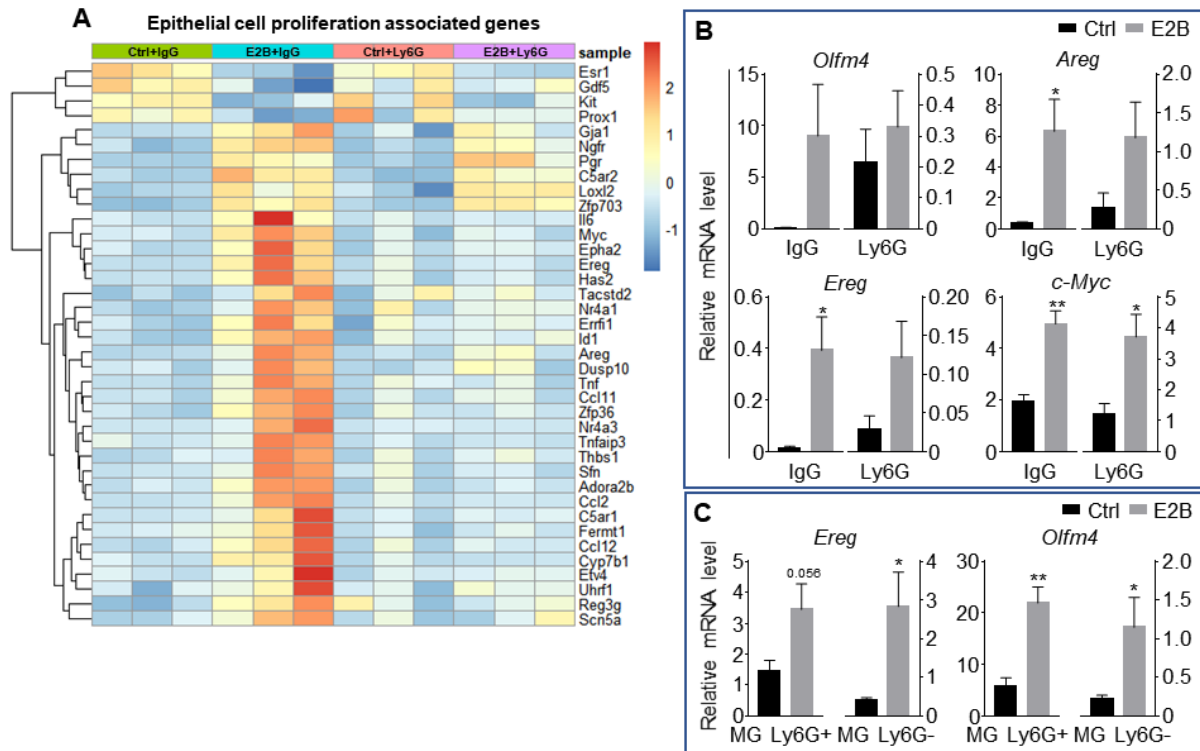

**Supplementary Figure 7. Estrogen-induced genes associated with cell proliferation are regulated in both mammary gland and neutrophil population.** A-B, Mice at INV D1 was treated with anti-Ly6G antibody (Ly6G) or isotype control (IgG). 24h later, they were treated with vehicle control (Ctrl) or E2B for 24h; A, Heatmap representation of genes associated to epithelial cell proliferation identified from the GO over-representation analysis ( $\geq 2$  and  $\leq -2$ -fold) of the DESeq2 analysed RNA-Seq data; B, E2B induces proliferative gene expression independent of neutrophil presence; qPCR validation of estrogen-induced expression of *Areg*, *c-Myc*, and *Ereg* relative to *36b4* (Ctrl+IgG n=3, Ctrl+Ly6G n=3, E2B+IgG n=3, E2B+Ly6G n=3). C, *Ereg* and *Olfm4* were induced by estrogen in both mammary neutrophil and non-neutrophil population; Mice at INV D2 was treated with Ctrl or E2B for 24h. Gene expression of *Ereg* and *Olfm4* analysed in both Ly6G+ and Ly6G-population by qPCR analysis (Ctrl n=5, E2B n=5). Data represented as mean  $\pm$  SEM.

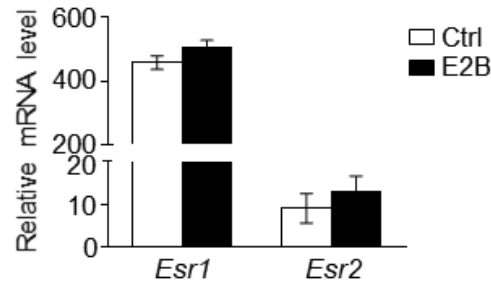

**Supplementary Figure 8. Expression of *Esr1* (ER $\alpha$ ) is about 40 times higher than *Esr2* (ER $\beta$ ) in mammary neutrophils during mammary involution.** Mice at INV D2 was treated with either vehicle control (Ctrl) or E2B for 8h. Mammary neutrophils were isolated from tissue using Dynabeads® bound anti-Ly6G antibody. Gene expression of *Esr1* and *Esr2* relative to *36b4* were analysed in Ly6G+ population by qPCR analysis (Ctrl n=4, E2B n=4). Data represented as mean  $\pm$  SEM.



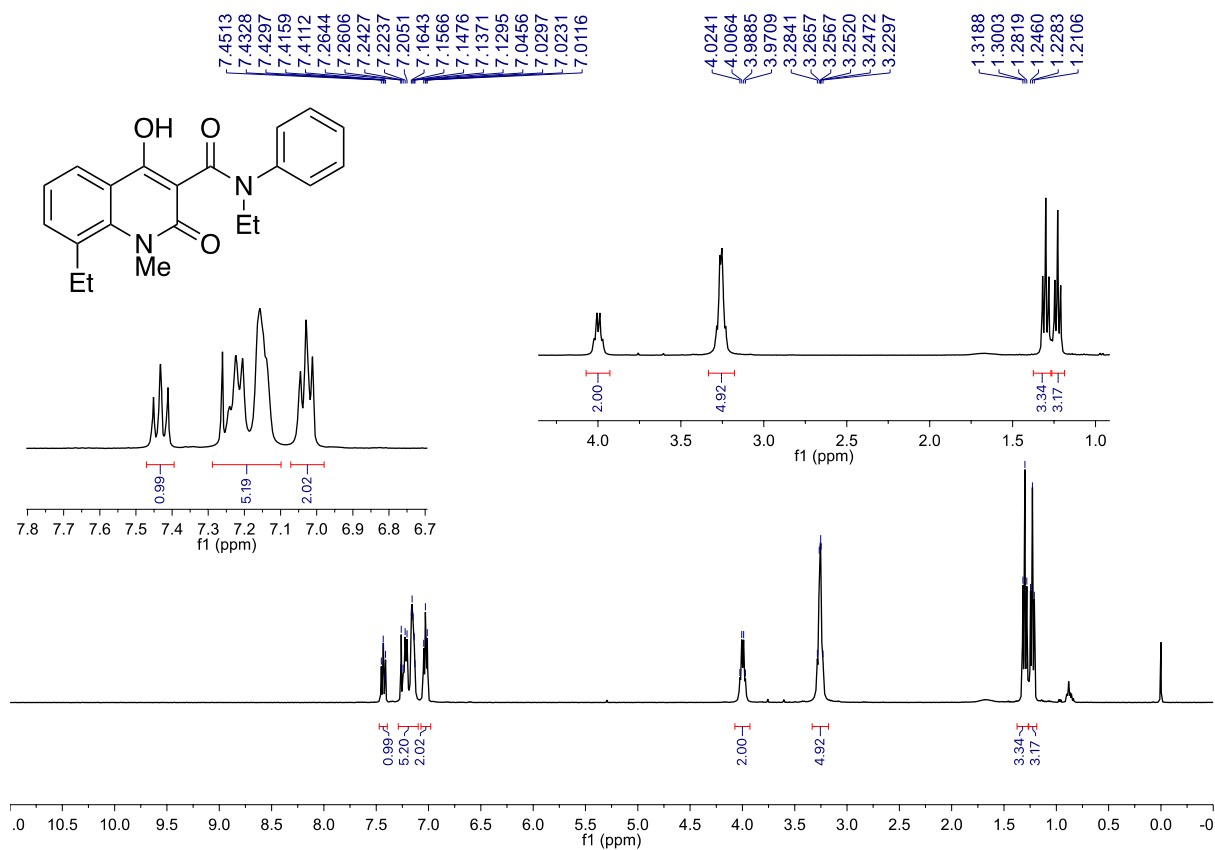

**Supplementary Figure 9.  $^1\text{H}$  NMR Spectrum of the synthesized Paquinimod (PAQ):**  $^1\text{H}$  NMR ( $\text{CDCl}_3$ , 400 MHz)  $\delta$  7.43 (1H, dd,  $J = 8.6, 7.4$  Hz), 7.29 – 7.10 (5H, m), 7.03 (2H, dd,  $J = 8.1, 5.5$  Hz), 4.00 (2H, q,  $J = 7.1$  Hz), 3.28 – 3.23 (3H+2H m), 1.30 (3H, t,  $J = 7.4$  Hz), 1.23 (3H, t,  $J = 7.1$  Hz).  $^1\text{H}$  NMR spectrum was recorded on a Bruker Avance 400 spectrometer.

| Gene          | Forward primer             | Reverse primer             |
|---------------|----------------------------|----------------------------|
| <i>36b4</i>   | GATCGGGTACCCAACCTGTTGCC    | CAGGGGCAGCAGCCGCAAATGC     |
| <i>Acod1</i>  | AGTTTTCTGGCCTCGACCTG       | AGAGGGAGGGTGGAAATCTCT      |
| <i>Adig</i>   | CTCTACCAGGTACCATCTGGG      | CTTCCAGGTTCCGGGTCATC       |
| <i>Areg</i>   | CACAGCGAGGATGACAAGGA       | GAGGATGATGGCAGAGACAAAGA    |
| <i>Bid</i>    | CCATGTAGGTGGGCTTCTGTCTAA   | CATGGTTTGAGATCAGCCATTCGG   |
| <i>Cebpb</i>  | CGCCTTATAAACCTCCCGCT       | TGGCCACTTCCATGGGTCTA       |
| <i>Cebpd</i>  | AGAACGAGAAGCTGCATCAGC      | TTGAAGAAGCTGCCGGAGGC       |
| <i>Clec4d</i> | CCGAGAGGAGCCACAGCC         | TCATGCCAGGTCTGGTTGTCA      |
| <i>Clec4e</i> | TGCTACAGTGAGGCATCAGG       | GGTTTTGTGCGAAAAAGGAA       |
| <i>c-Myc</i>  | CACCAGCAGCGACTCTGAA        | CCCGACTCCGACCTCTTG         |
| <i>Ctsb</i>   | TCCTTGATCCTTCTTTCTTGCC     | ACAGTGCCACACAGCTTCTTC      |
| <i>Csn2</i>   | CATCCTCGCCTGCCTTGTGGC      | CCATGAGATTCACCTTCTGAA      |
| <i>Cxcl1</i>  | ATCCAGAGCTTGAAGGTGTTG      | GTCTGTCTTCTTTCTCCGTTACTT   |
| <i>Cxcl2</i>  | CCAACCACCAGGCTACAG         | GCGTCACACTCAAGCTCTG        |
| <i>Cxcr2</i>  | ATGCCCTCTATTCTGCCAGAT      | GTGCTCCGGTTGTATAAGATGAC    |
| <i>Egr2</i>   | CTCCCGTATCCGAGTAGC         | GATGCCCGCACTCACAAAT        |
| <i>Ereg</i>   | TGCTTTGTCTAGGTTCCACC       | CGGGGATCGTCTTCCATCTG       |
| <i>Gapdh</i>  | TGCACCACCAACTGCTTAG        | GAGGCAGGGATGATGTTT         |
| <i>Il1b</i>   | CAACCAACAAGTGATATTCTCCATG  | GATCCACACTCTCCAGCTGCA      |
| <i>Mirt2</i>  | TCAACACTTCCATAGGT          | ATTGTGAGGTCCAGATAG         |
| <i>Mmp19</i>  | AGGTGTTCTGTTTAAGGGCT       | CGAAGTTGCTGGTTAAGGCG       |
| <i>Mmp3</i>   | TGGCCATCTCTTCCATCCAA       | CCCAGAACTGATTTCTTTAAAAATG  |
| <i>Mmp8</i>   | ACCAGTGCTGGAGATATGACA      | ACTCCTGGGAACATGCTTGG       |
| <i>Mmp9</i>   | CTGCATTTCTTAAGGACGG        | AAGTCGAATCTCCAGACACG       |
| <i>Olfm4</i>  | CTGCTCCTGGAAGCTGTAGTC      | GGAGAGTAATCTCGGCCCA        |
| <i>S100a8</i> | CGAAAACCTTGTTTCAGAGAATTGGA | ACTTTTATCACCATCGCAAGGAA    |
| <i>S100a9</i> | GTTGATCTTTGCCTGTCATGAG     | AGCCATTCCCTTTAGACTTGG      |
| <i>Timp1</i>  | GATATGCCCAAGTCCAGAACCC     | GCACACCCACAGCCAGCACTAT     |
| <i>Timp2</i>  | GGAATGACATCTATGGCAACC      | GGCCGTGTAGATAAACTCGAT      |
| <i>Trem1</i>  | GAGCTTGAAGGATGAGGAAGGC     | CAGAGTCTGTCACTTGAAGGTCAGTC |
| <i>Trem3</i>  | ATCTGTGTCGTCAGGTCACGG      | CTGGCTTCCCTTGACACCAT       |

**Supplementary Table 1. List of qPCR primers used.**

| Antibody                             | Catalog number  | Dilution | Company                  |
|--------------------------------------|-----------------|----------|--------------------------|
| Mouse anti-STAT3                     | 610189          | 1:1000   | BD Biosciences           |
| Rabbit anti-p-STAT3 (Y705)           | 9131            | 1:1000   | Cell Signaling           |
| Goat anti-CTSD                       | Sc-6486         | 1:1000   | Santa Cruz Biotechnology |
| Goat anti-CTSB                       | Sc-6493         | 1:1000   | Santa Cruz Biotechnology |
| Rat anti-CTSL                        | MAB9521         | 1:1000   | RnD Systems              |
| Rabbit anti-PARP                     | 9542            | 1:1000   | Cell Signaling           |
| Mouse anti-p53 (Ab-6)                | OP43            | 1:1000   | Calbiochem               |
| Mouse anti-GAPDH                     | AM4300          | 1:10000  | Ambion                   |
| Rabbit anti-LAMP2                    | ADI-905-723-100 | 1:1000   | Enzo Life Sciences       |
| Mouse anti- $\beta$ -tubulin         | M2008           | 1:10000  | SABio                    |
| Anti-rabbit IgG, HRP-linked Antibody | 7074            | 1:2000   | Cell Signaling           |
| Rabbit anti-Cleaved caspase 3        | 9661            | 1:1000   | Cell Signaling           |
| Rabbit anti-Perilipin                | 3470            | 1:100    | Cell Signaling           |
| Anti-mouse IgG, HRP-linked Antibody  | 7076            | 1:2000   | Cell Signaling           |
| rabbit anti-goat IgG-HRP             | sc-2768         | 1:5000   | Santa Cruz Biotechnology |

**Supplementary Table 2. List of antibodies used.**
